# Supplementary material for: Effects of an e-health intervention ‘iSupport’ for reducing distress of dementia carers: protocol for a randomised controlled trial and feasibility study
Source: PubMed Central journal article supplement (PMC9494593; doi:10.1136/bmjopen-2022-064314), 2022-09-21
Supplement: bmjopen-2022-064314.draft_revisions.pdf [file bmjopen-2022-064314.draft_revisions.pdf]

# BMJ Open

BMJ Open is committed to open peer review. As part of this commitment we make the peer review history of every article we publish publicly available.

When an article is published we post the peer reviewers' comments and the authors' responses online. We also post the versions of the paper that were used during peer review. These are the versions that the peer review comments apply to.

The versions of the paper that follow are the versions that were submitted during the peer review process. They are not the versions of record or the final published versions. They should not be cited or distributed as the published version of this manuscript.

BMJ Open is an open access journal and the full, final, typeset and author-corrected version of record of the manuscript is available on our site with no access controls, subscription charges or pay-per-view fees (<http://bmjopen.bmj.com>).

If you have any questions on BMJ Open's open peer review process please email [info.bmjopen@bmj.com](mailto:info.bmjopen@bmj.com)

# BMJ Open

## A protocol for a randomised controlled trial and feasibility study of the effects of an e-health intervention 'iSupport' for reducing distress of dementia carers.

|                               |                                                                                                                                                                                                                                                                                                                                                                                                                                                                                                                                                                                                                                                                                                                                                                                                                                                                                                                                                                                            |
|-------------------------------|--------------------------------------------------------------------------------------------------------------------------------------------------------------------------------------------------------------------------------------------------------------------------------------------------------------------------------------------------------------------------------------------------------------------------------------------------------------------------------------------------------------------------------------------------------------------------------------------------------------------------------------------------------------------------------------------------------------------------------------------------------------------------------------------------------------------------------------------------------------------------------------------------------------------------------------------------------------------------------------------|
| Journal:                      | <i>BMJ Open</i>                                                                                                                                                                                                                                                                                                                                                                                                                                                                                                                                                                                                                                                                                                                                                                                                                                                                                                                                                                            |
| Manuscript ID                 | bmjopen-2022-064314                                                                                                                                                                                                                                                                                                                                                                                                                                                                                                                                                                                                                                                                                                                                                                                                                                                                                                                                                                        |
| Article Type:                 | Protocol                                                                                                                                                                                                                                                                                                                                                                                                                                                                                                                                                                                                                                                                                                                                                                                                                                                                                                                                                                                   |
| Date Submitted by the Author: | 14-Jun-2022                                                                                                                                                                                                                                                                                                                                                                                                                                                                                                                                                                                                                                                                                                                                                                                                                                                                                                                                                                                |
| Complete List of Authors:     | Windle, Gill; Bangor University<br>Flynn, Greg; Bangor University<br>Hoare, Zoe; Bangor University, North Wales Organisation for Randomised Trials in Health<br>Masterson-Algar, Patricia; Bangor University College of Health and Behavioural Sciences, School of Health Sciences<br>Egan, Kieren; University of Strathclyde, Department of Computer and Information Science<br>Edwards, Rhiannon; Bangor University, Centre for Health Economics & Medicines Evaluation<br>Jones, Carys; Bangor Univ<br>Spector, Aimee; University College London (UCL), Department of Clinical, Educational and Health Psychology<br>Algar-Skaife, Katherine; NTNU), Department of Neuro-medicine and Movement Science<br>Hughes, Gwenllian; Bangor University<br>Brocklehurst, P; Bangor University<br>Goulden, Nia; Bangor University, NWORD CTU<br>Skelhorn, Debbie; Bangor University<br>Stott, Joshua; University College London Research Department of Clinical Educational and Health Psychology |
| Keywords:                     | Dementia < NEUROLOGY, Telemedicine < BIOTECHNOLOGY & BIOINFORMATICS, HEALTH ECONOMICS                                                                                                                                                                                                                                                                                                                                                                                                                                                                                                                                                                                                                                                                                                                                                                                                                                                                                                      |
|                               |                                                                                                                                                                                                                                                                                                                                                                                                                                                                                                                                                                                                                                                                                                                                                                                                                                                                                                                                                                                            |

SCHOLARONE™  
Manuscripts

1  
2  
3  
4 **A protocol for a randomised controlled trial and feasibility study of the effects of an**  
5 **e-health intervention ‘iSupport’ for reducing distress of dementia carers.**  
6  
7  
8  
9

10  
11 **Authors**

12 Gill Windle<sup>1</sup>, Greg Flynn<sup>1</sup>, Zoë Hoare<sup>1</sup>, Patricia Masterson-Algar<sup>1</sup>, Kieren Egan<sup>2</sup>, Rhiannon  
13 Tudor Edwards<sup>1</sup>, Carys Jones<sup>1</sup>, Aimee Spector<sup>3</sup>, Katherine Algar-Skaife<sup>4</sup>, Gwenllian  
14 Hughes<sup>1</sup>, Paul Brocklehurst<sup>1</sup>, Nia Goulden<sup>1</sup>, Debbie Skelhorn<sup>1</sup>, Joshua Stott<sup>3</sup>.  
15  
16  
17  
18  
19  
20  
21  
22  
23

24 <sup>1</sup> School of Medical and Health Sciences, Bangor University, Bangor, UK

25 <sup>2</sup> Department of Computer and Information Science, University of Strathclyde, UK

26 <sup>3</sup> Department of Clinical, Educational and Health Psychology, University College London  
27 (UCL), London, UK  
28

29 <sup>4</sup> Department of Neuro-medicine and Movement Science (INB), Norwegian University of  
30 Science and Technology (NTNU), Trondheim, Norway.  
31  
32  
33  
34  
35  
36  
37  
38  
39

40 Corresponding author: Professor Gill Windle, DSDC Wales Research Centre/Ageing and  
41 Dementia @ Bangor, School of Medical and Health Sciences, Bangor University, Fron  
42 Heulog, Bangor, Gwynedd, Wales. [g.windle@bangor.ac.uk](mailto:g.windle@bangor.ac.uk)  
43  
44  
45  
46  
47  
48

49 Word count for article summary and main text =3588 (excluding title page, abstract,  
50 references, figures and tables).  
51  
52  
53  
54  
55  
56  
57  
58  
59  
60

## ABSTRACT

**Introduction:** In the United Kingdom, National Health Service (NHS) guidelines recommend that informal carers of people living with dementia should be offered training to help them develop care skills and manage their own physical and mental health. The World Health Organization (WHO) recommend access to affordable, proven, well-designed, online technologies for education, skills-training and support for dementia carers. In response to these recommendations, this multi-site randomised controlled trial (RCT) is the first study in the UK to evaluate the clinical and cost-effectiveness of an online support programme developed by the WHO called ‘iSupport for dementia carers.’

**Methods and analysis:** 350 informal carers (age 18+) living in Britain who self-identify as experiencing stress and depression will be recruited. They will be randomised to receive ‘iSupport’, or standardised information about caring for someone with dementia (control-comparison). Data will be collected via videoconferencing (e.g. Zoom) or telephone interview at baseline, three months and six months. Intention-to-treat analysis will ascertain effectiveness in the primary outcomes (distress and depression) and combined cost and quality adjusted life year (QALY) data will be used to assess cost-effectiveness compared with usual care from a public sector and wider societal perspective. A mixed-methods process evaluation with a sub-group of carers in the intervention (~N=50) will explore the barriers and facilitators to implementing ‘iSupport’. A non-randomised feasibility study will adapt ‘iSupport’ for young carers (N=38 participants, age 11-17).

1  
2  
3 **Ethics and dissemination:** The research plan was scrutinised by National Institute for Health  
4  
5 Research reviewers ahead of funding being awarded. Ethical approval was granted by Bangor  
6  
7 University's School of Health and Medical Sciences Academic Ethics Committee, reference  
8  
9 number 2021-16915. Dissemination plans include delivering events for stakeholders, social  
10  
11 media, a project website, developing policy briefings, presenting at conferences and  
12  
13 producing articles for open access publications.  
14  
15

16  
17  
18 **Registration details:** ISRCTN reference number 17420703.  
19  
20

21  
22 **Keywords:** dementia; carers; iSupport; technology; internet; website; randomized controlled  
23  
24 trial; protocol; process evaluation; cost effectiveness; young carers.  
25  
26  
27  
28  
29  
30  
31  
32  
33  
34  
35  
36  
37  
38  
39  
40  
41  
42  
43  
44  
45  
46  
47  
48  
49  
50  
51  
52  
53  
54  
55  
56  
57  
58  
59  
60

## ARTICLE SUMMARY

### Strengths and limitations of this study

- iSupport for dementia carers was developed by experts at the WHO and is based on techniques with proven therapeutic efficacy, consequently the content is informed by a considerable body of evidence.
- The ‘real world’ application of the RCT requires carers to self-identify as experiencing some level of stress or depression, but some may have mild symptoms, limiting the potential for improving these primary outcomes.
- Although the research assistants will be ‘blind’ to the randomisation, a limitation of the study includes being unable to completely blind the participants to their respective allocation (iSupport or information about being a carer).
- Remote data collection and intervention delivery will potentially reach a broader and more diverse range of carers beyond the geographical boundaries often experienced through in-person data collection, however this could also create challenges for recruiting to target.
- The feasibility study will work with young people to generate valuable information leading to an adapted version of ‘iSupport’ for young carers.

## INTRODUCTION

‘Dementia’ is an umbrella term for a cluster of symptoms that characterise neurodegenerative changes, decline and loss of cognitive functioning. Dementia is one of the leading causes of care dependency, disability and death around the world.<sup>1</sup> The number of people living with dementia is predicted to increase globally, and it is estimated the number of people living with dementia in the UK will increase 80% by 2040.<sup>2</sup> The limited medical treatments available for people living with dementia mean that in the UK, most people living with dementia are cared for at home,<sup>3</sup> supported by a family member or friend who often performs care tasks similar to those carried out by paid health or social service providers. The detrimental impact of caregiving on the physical and mental health of informal carers is well-documented;<sup>4,5</sup> a meta-analysis found carers were more stressed, depressed, and had lower levels of subjective well-being, physical health, and self-efficacy than non-carers.<sup>6</sup>

Dementia carers have expressed a need for: a) relevant information and knowledge; b) support with the management of care recipients’ functioning, behavioural and psychological symptoms; c) support with their own physical and mental health; d) support regarding their unbalanced social life.<sup>7</sup> In the face of these significant challenges, Action Area 5 of the World Health Organization’s Global Action Plan on Dementia 2017-2025 prioritises supporting carers, calling for the provision of accessible evidence-based information to improve knowledge and skills, and prevent stress and health problems.<sup>8</sup>

To address these challenges the World Health Organization (WHO) developed ‘iSupport’, an evidence-informed e-health intervention designed to help dementia carers provide good care and take care of themselves. The content reflects evidence that the most effective interventions for carers’ psychological health should incorporate both an educational

1  
2  
3 component to enhance knowledge, and a therapeutic component, such as Cognitive  
4 Behavioural Therapy /cognitive reframing.<sup>9</sup> Such interventions are often delivered in-person,  
5  
6 however the ongoing Covid-19 pandemic led to reductions, delays and withdrawal of many  
7  
8 support services for carers.<sup>10</sup> Online interventions could be one solution to providing  
9  
10 support, negating general accessibility barriers such as carers' time constraints or needing to  
11  
12 travel to receive care and support,<sup>11</sup> due to their convenience of use, low delivery costs, and  
13  
14 the ability to negate geographical barriers.<sup>12</sup> The potential for scalability is also relevant, as  
15  
16 few e-health interventions for carers are implemented outside a research setting.<sup>13,14,15</sup>  
17  
18 However, despite their potential, the evidence base remains limited and high-quality studies  
19  
20 are required to enable definitive conclusions about their effectiveness.<sup>16</sup> In response, this  
21  
22 study aims to contribute to this growing area of healthcare delivery.  
23  
24  
25  
26  
27  
28  
29  
30

31 'iSupport' is in the process of global implementation and there is research underway in The  
32  
33 Netherlands, India and Portugal,<sup>17,18,19</sup> but to date, there is no published evidence as to the  
34  
35 effectiveness of 'iSupport'. This will be the first study to examine the effectiveness and cost  
36  
37 effectiveness of a globally targeted e-health intervention in a majority English-speaking  
38  
39 population of dementia carers. It will also evaluate the feasibility of adapting 'iSupport' for  
40  
41 young carers (ages 11-17). It is vital that current and future carers have access to education  
42  
43 programmes that are tailored to address their particular needs,<sup>20</sup> as current generic dementia  
44  
45 support services are not able to address the specific challenges young carers face.  
46  
47  
48  
49  
50

## 51 **Research questions**

52  
53  
54 1. Are carer distress and depression (primary outcomes) significantly reduced in participants  
55  
56 allocated to receive 'iSupport' compared to participants allocated to a control-comparison  
57  
58 group receiving standardised information about caring for someone with dementia?  
59  
60



2. Are symptoms of anxiety (secondary outcome) significantly reduced and resilience, relationship quality and dementia knowledge (secondary outcomes) significantly increased in participants allocated to receive 'iSupport' compared to participants allocated to the control-comparison group?
3. What are participant and contextual barriers and facilitators to implementation of 'iSupport'?
4. What potential mechanisms might underpin changes in outcomes from using 'iSupport'?
5. What is the cost-effectiveness of 'iSupport' compared to standardised information about dementia?
6. Is it feasible and acceptable to digitally deliver a refined 'iSupport' to young carers?
7. What are the carers' perspectives of 'iSupport' in relation to supporting them in an ongoing or future repeated pandemic such as COVID-19?

## METHODS AND ANALYSIS

### Study design

'iSupport' for dementia carers is a multi-centre randomised controlled trial (RCT) and feasibility study composed of four workstreams (WS). WS1 will evaluate the effectiveness of 'iSupport' (compared to a control-comparison) in reducing carer distress and symptoms of depression (multiple primary outcomes), reductions in anxiety, improvements in resilience, relationship quality, and dementia knowledge (secondary outcomes). WS2 (process evaluation) will examine how participants engaged with 'iSupport', whether there are any barriers to its uptake, and any perceived benefits for the carer. WS3 (health economic evaluation) will calculate the cost-effectiveness of 'iSupport' from a public sector perspective<sup>21</sup> and from a wider societal perspective. WS4 (feasibility study) will adapt 'iSupport' for young carers, and assesses the feasibility, acceptability and uptake of conducting a larger trial. Supplementary File 1 contains the objectives for each workstream. This protocol was developed according to the SPIRIT (2013) checklist<sup>22</sup>. The study runs for

36 months (1<sup>st</sup> January 2021 to 31<sup>st</sup> December 2023). At the end of their involvement in the study, all participants will receive information about regional support services and a £20 voucher.

### RCT participant recruitment

Carers living in England, Scotland and Wales will be recruited between December 2021 and January 2023 by researchers working from Bangor University (co-ordinating centre), University College London, or University of Strathclyde (collaborating sites). Researchers will advertise the study through social media; our study partners (Alzheimer Scotland and Carers Trust Wales) and other non-statutory organisations will advertise the study to regional groups through their networks; and the Join Dementia Research (JDR)<sup>23</sup> register will be used to identify potential participants (Supplementary File 2 ). All carers who express an interest in taking part will be sent a consent form, information sheet and be invited to discuss their involvement with a researcher in a one-to-one videoconferencing or phone meeting, when the researcher would also assess their eligibility (Table 1).

Table 1: Eligibility criteria for the RCT.

|                    |                                                                                                                                                                                                                                                                                                                                                                                           |
|--------------------|-------------------------------------------------------------------------------------------------------------------------------------------------------------------------------------------------------------------------------------------------------------------------------------------------------------------------------------------------------------------------------------------|
| Inclusion criteria | <p>1) Adults (age 18+) who self-identify as an unpaid carer of a person with dementia who is not living in a full-time care facility, caring at least weekly for at least 6 months.</p> <p>2) Self-identify as experiencing at least some stress, depression or anxiety.</p> <p>3) The care recipient has to have a confirmed diagnosis of dementia through self-report of the carer.</p> |
| Exclusion criteria | <p>1) Receiving psychological treatment from a mental health specialist at the time of recruitment.</p>                                                                                                                                                                                                                                                                                   |

- 2) Unable to comprehend written English.
  - 3) No access to the internet.
  - 4) Unable to give informed consent to the trial.
  - 5) Have previously used 'iSupport' materials in the last 12 months.
- 

A nested internal pilot study at each site will monitor progression criteria over the first six months of recruitment. Go/review/stop criterion will be assessed by the study's independent data monitoring committee (IDMC), and decisions about the study conduct will be made in consultation with the trial steering committee (TSC) and the Trial Management Group (TMG).

### **RCT sample size and randomisation**

A meta-analysis reported that technology-based interventions for informal carers of people living with dementia are effective in reducing both depression and burden outcomes.<sup>24</sup> Consequently both are important outcomes for carers, and the sample size considers these as multiple primary endpoints at six months. The multiple primary endpoint estimator in the R package<sup>25,26</sup> with power of 90% and significance set to 2.5%, established that 262 participants are required at six months to have the potential to detect an effect in at least one of these outcomes. The attrition rate was based on 9 dementia intervention studies, where the mean retention rate was 15.33% (range 2%-24%). Accommodating a 25% attrition rate by six months, the RCT will recruit and randomise 350 participants. Randomisation uses dynamic allocation to protect against subversion.<sup>27</sup> This ensures the trial maintains good balance to the allocation ratio of 1:1, both within each stratification variable and overall for the trial. Stratification variables will be site, along with age and gender, previously found to influence the outcome measure of caregiver distress.<sup>28</sup>

### RCT 'iSupport' intervention

iSupport is an internet-based psychoeducation and skills development intervention that can be accessed through a personal computer, tablet or mobile phone. The theoretical underpinnings of 'iSupport' are based on person-centred care, recognising that dementia care should reflect the individual's needs, personality and abilities<sup>29</sup> and are integrated into the interactive content of 'iSupport'. The self-care techniques are based on theoretically informed programmes with some evidence for benefits, including psychoeducation, relaxation, behavioural activation, cognitive reframing, and problem-solving.<sup>30</sup> Participants will access iSupport in their own homes or a place where they are able to access the internet.

'iSupport' consists of five main themes and twenty-three accompanying exercises (Figure 1).

Each exercise takes approximately 5-15 minutes and follows the same format: information about a topic presented; short interactive exercises and questions with instant feedback on responses; a summary of the lesson; a relaxation exercise. 'iSupport' is based on personal choice: carers can construct their own personalised plan and access which sessions they feel are most relevant to them at that point in time. Participants will be advised to use 'iSupport' regularly in order to obtain the most benefit. They will be provided with the contact details of an 'e-coach' (member of the research team), who will explain anything that is not clear about the 'iSupport' programme. The 'e-coach' will contact participants allocated to intervention shortly after randomisation, 1 month later and 2 months later (if required by the participant).

'iSupport' will be translated into Welsh following WHO adaptation guidelines.

Approximately one-fifth of the Welsh population speak Welsh<sup>31</sup> and the Welsh Government is committed to offering bilingual services as part of health care provision. To improve access, an audio/read aloud function is included in the iSupport programme.

(Figure 1)

### **RCT control-comparison to iSupport**

The control-comparison group will receive an information booklet (online and/or hard copy) about caring for someone with dementia, developed by the Alzheimer's Society.<sup>32</sup> Alongside this education, carers will receive care-as-usual. They can search for other information or seek help from other providers. Participants allocated to the control-comparison group will be provided with access to 'iSupport' at the end of data collection.

### **RCT data collection**

Case report forms (CRFs) were initially piloted by researchers, and adjustments made to reduce the time-burden to participants without affecting the study's ability to address the research questions. Data will be collected at three time-points: Baseline (T0), 3-months post-baseline (T1 follow-up), and 6-months post-baseline (T2 follow-up). Researchers will interview participants by videoconferencing or phone. Following the baseline interview, researchers will perform the randomisation and the CI or trial manager will email the participant their group allocation details. Follow-up interviews will be administered by researchers who are blinded to group allocation. An acceptable tolerance for follow-ups will be up to 2 weeks earlier and up to 4 weeks later than the exact T1 or T2 date. Figure 2 shows the flow of the participants through the study.

(Figure 2)

All data will be entered into an electronic database (MACRO),<sup>33</sup> and the study statistician will periodically monitor data quality. Table 2 shows the outcome measures, order of administration and the relevance for each workstream.

Table 2: Data collection for iSupport RCT

| Questionnaire or study-specific questions                                             | Time point | Workstream |
|---------------------------------------------------------------------------------------|------------|------------|
| Local COVID-19 alert level at date of assessment                                      | T0, T1, T2 | 1,2,3      |
| Demographic questions                                                                 | T0         | 1,2,3      |
| Employment, marital status, and living situation questions                            | T0, T1, T2 | 1,2,3      |
| 12-item Zarit Burden Interview (ZBI-12)* <sup>i</sup>                                 | T0, T1, T2 | 1,3        |
| 10-item Centre for Epidemiological Studies Depression Scale (CES-D-10)* <sup>ii</sup> | T0, T1, T2 | 1,3        |
| EQ-5D-5L <sup>iii</sup>                                                               | T0, T1, T2 | 3          |
| Resilience Scale-14 (RS-14) <sup>iv</sup>                                             | T0, T1, T2 | 1          |
| Generalised Anxiety Disorder Questionnaire (GAD-7) <sup>v</sup>                       | T0, T1, T2 | 1          |
| Dementia Knowledge Assessment Scale (DKAS) <sup>vi</sup>                              | T0, T1, T2 | 1          |
| Adapted Erasmus iMTA informal care questionnaire <sup>vii</sup>                       | T0, T1, T2 | 3          |
| Service use questions                                                                 | T0, T1, T2 | 3          |
| Quality of the Carer-Patient Relationship (QCPR) <sup>viii</sup>                      | T0, T1, T2 | 1          |
| Dementia Quality of Life - Proxy measure (DEMQOL-Proxy) <sup>ix</sup>                 | T0, T1, T2 | 1,3        |
| Researcher remains blinded to allocation question                                     | T1, T2     | 1          |

\*indicates primary outcome measure for WS1

## WS2 Process evaluation sampling and data collection

The process evaluation utilises three different approaches to data collection:

1. Semi-structured interviews will be undertaken with up to 50 of carers in the intervention group following their T2 interview. The choice of sample size in qualitative research is an area of debate,<sup>34</sup> however our decision was informed by Ritchie and colleagues<sup>35</sup> who recommend that studies employing individual interviews should undertake no more than 50

1  
2  
3 interviews in order to manage the complexity of the analysis. Baseline data will inform a  
4  
5 purposive sampling strategy and a qualitative sampling matrix will be developed. This matrix  
6  
7 will include a diverse range of participant demographic characteristics such as age, gender  
8  
9 and caring responsibilities and differences in scores across the the ZBI-12 and the CES-D-10  
10  
11 scores (low, medium, high).  
12  
13  
14  
15  
16

17 The interview topics will be guided by the process evaluation parameters described in  
18  
19 recognised frameworks,<sup>36,37</sup> and drawing upon theoretical models such as Normalisation  
20  
21 Process Theory (NPT).<sup>38</sup> Motives for declining participation will also be noted where consent  
22  
23 is given, to understand any barriers to participation and potential selection bias.  
24  
25  
26  
27  
28

29 2. Data from the online platform will be collected regarding usability (e.g. frequency and  
30  
31 length of use, which modules/sessions/pages users most frequently visit, average time spend  
32  
33 on each module/session/page, whether accessed from tablet, PC or mobile phone). The  
34  
35 number of contacts with the e-coach will be recorded.  
36  
37  
38  
39

40 3. An online evaluation questionnaire will collect quantitative data from all study participants  
41  
42 in the intervention arm and will be administered at 6-month follow-up (T2). This  
43  
44 questionnaire will evaluate the overall usability and acceptability of the 'iSupport' platform  
45  
46 in conjunction with all other data collection methods.  
47  
48  
49  
50

#### 51 **WS4 Feasibility study: participant recruitment**

52 Young carers and professionals who have regular contact with young carers will be recruited  
53  
54 through stakeholders' networks, social media, and national carers associations (Table 3).  
55  
56  
57

58 Researchers will approach parents or legal guardians of participants under the age of 16 to  
59  
60

explain their child's involvement and obtain their consent from them. Supplementary File 3 visualises the phases of the feasibility study.

Table 3: Feasibility study eligibility criteria

| Inclusion | Young carers                                                                                                                                                                                                                                                                                                           | Professionals                                                                                                                                                                         |
|-----------|------------------------------------------------------------------------------------------------------------------------------------------------------------------------------------------------------------------------------------------------------------------------------------------------------------------------|---------------------------------------------------------------------------------------------------------------------------------------------------------------------------------------|
| criteria  | <p>1) Young people between the ages of 11 - 17 who self-identify as a carer of a person with dementia who is not living in a full-time care facility, caring at least weekly for at least 6 months.</p> <p>2) The care recipient has to have a confirmed diagnosis of dementia (through self-report of the carer).</p> | <p>1) Have regular contact with young people and young carers (e.g. teaching staff involved in pastoral care, young carer charity workers, social workers in children's services.</p> |
| Exclusion | <p>1) Receiving treatment from Child and Adolescent Mental Health Services (CAMHS) at the time of recruitment.</p> <p>2) Unable to comprehend written English.</p> <p>3) No access to the internet.</p> <p>4) Have previously used 'iSupport' materials in the last 12 months.</p>                                     | <p>1) No regular contact with young people and young carers as part of their work.</p> <p>2) Unable to comprehend written English.</p> <p>3) No access to the internet.</p>           |



## **WS4: data collection**

### ***Phase 1: Adapting 'iSupport' for young carers***

Three x 3-hour workshops will be conducted either in person or using videoconferencing software (e.g. Zoom, Teams or Skype) depending on the government guidelines regarding COVID-19 and safety. At least two weeks before the workshops, participants will be given online access to 'iSupport' and printed materials for annotations. Workshop One will recruit 6-8 young carers to discuss their care-giving experiences, which aspects are reflected or missing in 'iSupport', and opinions on the content and style of the intervention. Workshop Two will undertake a similar exercise with 6-8 professionals who work with young carers. Feedback will be used to refine 'iSupport', which will be shared in Workshop Three with all participants who attended the first two workshops in order to produce a "final" version. Discussions around which outcomes are most important for young carers in relation to 'iSupport' will be used to adapt the CRF from the RCT for Phase 2.

### ***Phase 2: Feasibility testing 'iSupport' for younger dementia carers***

Young carers will test the feasibility of using the refined 'iSupport' and following the RCT procedures (except randomisation will not be required). After T2 data collection, participants will complete an online evaluation of their experience using 'iSupport'. Informed by a methodological framework,<sup>40</sup> a sample of n=30 for phase 2 will provide enough information on the acceptability of the intervention, the appropriateness of data collection forms, the feasibility of recruitment and consent procedures, and the most appropriate primary outcome measures.

## Data analysis plans

### *WS1 (research questions 1 and 2).*

WS1 Primary analysis is an intention-to-treat (ITT) analysis, blinded to treatment allocation.

The primary assessment for effectiveness will be adjusted estimates of the ZBI-12 and CES-D-10 scores between the two groups assessed at 6 months. A linear mixed-effects model adjusting for baseline scores, randomising site (random effect), and stratification variables will be fitted for each of the two primary outcomes. Similar models will be fitted for all continuous secondary outcomes. All estimates of effect will be presented together with 95% confidence intervals. The aim is to minimise missing data; however, predictors of missingness will be investigated using regression models and any predictors found will be considered for inclusion in the models. Multiple imputation will address missing scores where appropriate. Complier Average Causal Effect (CACE) analysis will assess the impact of the number of times the 'iSupport' intervention was accessed. A sensitivity analysis will assess any impact of the outcome measures being completed in Welsh. A full statistical analysis plan will be written and agreed with the independent committees before completion of the data collection.

### *WS2 Process evaluation (research questions 3, 4 and 7).*

Qualitative interview data analysis will be professionally transcribed verbatim and thematically analysed<sup>41</sup> using NVivo. Results will also be applied to aspects of the Context and Implementation of Complex Interventions (CICI) checklist<sup>42</sup>, which may reflect implementation in a 'real world' setting. This analysis will reveal the experiences of using iSupport and its delivery, the barriers and facilitators to its uptake and continued use, and the perceived benefits for the carer participating in iSupport and the person they are caring for. Descriptive analyses will profile the System Usability Scale and intervention platform

1  
2  
3 metrics regarding usability (e.g. most/least frequently visited pages, the most ‘popular’  
4  
5 modules/sessions).  
6  
7  
8  
9

### 10 ***WS3 Health economic evaluation (research question 5).***

11  
12 Primary analysis will be an ITT analysis as per WS1. Cost and quality-adjusted life years data  
13  
14 will be combined to calculate an incremental cost-effectiveness ratio. Cost-effectiveness  
15  
16 acceptability curves<sup>43</sup> will show the probability that ‘iSupport’ is cost-effective compared to  
17  
18 the control-comparison for a range of willingness-to-pay thresholds. Secondary cost-  
19  
20 effectiveness analyses will calculate the cost per unit change in the primary outcome  
21  
22 measures. A sub-group analysis will be conducted on the number of times that carers in the  
23  
24 intervention group accessed ‘iSupport’. Deterministic sensitivity analyses will be conducted  
25  
26 to vary the costs of inputs.  
27  
28  
29  
30  
31  
32

### 33 ***WS4 feasibility study (research question 6).***

34  
35 Data from Phase 1 workshops will be selectively transcribed, analysed and reported  
36  
37 according to established guidance<sup>44</sup>. All quantitative data collected during Phase 2 will be  
38  
39 presented descriptively. No inferential testing will be undertaken for this data. The mean  
40  
41 change from baseline, associated variances, and 95% confidence intervals will be calculated  
42  
43 for all selected outcomes. Consideration will be given to the applicability of these outcomes  
44  
45 for development into a protocol for a future RCT if the acceptability of the intervention is  
46  
47 proven. Success will be defined as acceptability of the recruitment and consent procedure,  
48  
49 data collection tools, intervention content and delivery to participants, as well as compliance.  
50  
51  
52  
53

### 54 **Patient and public involvement statement**

55  
56  
57 We involved people living with dementia and their carers in the development of this research.  
58  
59 This was achieved by collaborating with the ‘Caban group of dementia educators’,  
60

1  
2  
3 established and supported by the lead applicant's research centre. The group raised a number  
4  
5 of points for the team to consider, with 'fear of using the internet' being one area of concern.  
6  
7 The group felt a person should be available to help people with iSupport. In response we built  
8  
9 in provision for an 'e-coach' to support participants randomised to receive iSupport. Co-  
10  
11 applicant Hughes is a young adult carer for her father living with Vascular Dementia and felt  
12  
13 the needs of young carers are often overlooked and neglected. She has contributed to the  
14  
15 development of this research, especially the conceptualisation of the study design and  
16  
17 suggestions for the delivery of WS4, and is assisting with this phase. We will meet with the  
18  
19 CABAN group on a regular basis over the study duration, and at a previous meeting we  
20  
21 discussed how a visual participant information sheet could aid recruitment in line with  
22  
23 dementia research standards,<sup>45</sup> and that using videoconferencing software would be  
24  
25 preferable to phone calls for arranging and conducting remote interviews. Feedback from  
26  
27 this meeting was further referred to when drafting other study materials for consistency.  
28  
29  
30  
31  
32  
33  
34  
35

### 36 **ETHICS AND DISSEMINATION**

37  
38 iSupport was granted ethical approval by Bangor University's School of Medical and Health  
39  
40 Sciences Academic Ethics Committee (AEC), reference number 2021-16915. All researchers  
41  
42 are fully trained in the study procedures and receive regular supervision. A data management  
43  
44 and monitoring plan ensure adherence to the principles of Good Clinical Practice and relevant  
45  
46 regulations over the course of the study, and to effectively audit the day-to-day conduct at  
47  
48 each site. Carers will be provided with clear information and given time to ask questions and  
49  
50 consider whether to participate before providing consent. Through the content of our  
51  
52 information sheets and consent forms, as well as contact with the research team, participants  
53  
54 will understand that they can refuse to participate or withdraw at any time. Changes to the  
55  
56 study protocol will be agreed by the funder and an ethics amendment submitted to the AEC.  
57  
58  
59  
60

1  
2  
3 Our research products will include peer-reviewed academic papers, Plain English/Cymraeg  
4 Clir summaries of findings, articles for practitioner magazines and a project website. All  
5  
6 academic outputs will conform to the reporting procedures in the relevant methodology  
7  
8 guidelines (e.g. CONSORT e-health<sup>46</sup>). Economic evaluation findings will be reported  
9  
10 according to the recently updated CHEERS checklist, highlighting the role of PPIE relating to  
11  
12 health economics.<sup>47</sup> We will present at conferences, conduct public and stakeholder events,  
13  
14 and produce policy briefings.  
15  
16  
17  
18  
19  
20

21 Our research activities will generate new versions of the iSupport platform for Welsh-  
22  
23 language speakers, young carers, and a UK-focused version with audio function. If our  
24  
25 research shows iSupport is effective, health and care providers, pastoral care teams in  
26  
27 schools, and charitable organisations will be able to recommend an evidence-based online  
28  
29 support service to dementia carers that will be publicly available for use at no cost. We hope  
30  
31 this will improve policy and practice around delivering support to dementia carers. For  
32  
33 example UK health and social care could recommend the adapted versions of iSupport in  
34  
35 their dementia guidelines. This could reduce demand on community teams at post/diagnosis  
36  
37 and initial stages of dementia.  
38  
39  
40  
41  
42  
43  
44

45 Forthcoming in 2022 in a related project, we will be working in partnership with community  
46  
47 organisations to translate and adapt iSupport into three South-Asian languages (Urdu, Punjabi  
48  
49 and Bengali) to ensure minority ethnic groups in the UK can also access the support in a way  
50  
51 that is culturally appropriate for them.  
52  
53  
54  
55  
56  
57  
58  
59  
60

### **AUTHOR CONTRIBUTIONS**

GW leads the project and is responsible for study integrity. GW, JS, ZH, KE, PM-A, KAS, RTE, CJ, PB and GH critically reviewed the study proposal and secured the research funding. JS, AS and KE lead collaboration sites. P-MA leads work-streams 2 and 4. RTE leads work-stream 3. GF manages the study and led the ethics submission. All authors contributed to the research protocol, provided edits and critiqued the manuscript for intellectual content.

### **ACKNOWLEDGMENTS**

The authors are extremely grateful to Professor Anne Magriet Pot, Erasmus School of Policy and Health Management, Erasmus University, the Netherlands for her inspiration and encouragement to seek funding for this project, the Caban Group for their thoughtful and useful insights, and the research assistants (Danielle Proctor, Gwenllian Hughes, John Connaghan, Fatene Abakar Ismail) for piloting the case report forms and to Stéfanie Freel and Katrin Seeher of the World Health Organisation for their comments on the funding application and ongoing support for the project delivery.

### **FUNDING STATEMENT**

This project is funded by the National Institute for Health Research (NIHR) Public Health Research programme (project reference NIHR130914). The views expressed are those of the authors and not necessarily those of the NIHR or the Department of Health and Social Care.

### **DATA AVAILABILITY STATEMENT**

Data requests should be made with the Corresponding author.

### **COMPETING INTERESTS STATEMENT**

The authors declare they have no competing interests.

## REFERENCES

- 1  
2  
3  
4  
5  
6  
7  
8  
9  
10  
11  
12  
13  
14  
15  
16  
17  
18  
19  
20  
21  
22  
23  
24  
25  
26  
27  
28  
29  
30  
31  
32  
33  
34  
35  
36  
37  
38  
39  
40  
41  
42  
43  
44  
45  
46  
47  
48  
49  
50  
51  
52  
53  
54  
55  
56  
57  
58  
59  
60
- <sup>1</sup> World Health Organization. Global status report on the public health response to dementia [Internet]. Geneva: World Health Organization; 2021 Sep [cited 2022 Jan 28].  
<https://www.who.int/publications/i/item/9789240033245>
- <sup>2</sup> Wittenberg R, Hu B, Barraza-Araiza L, et al. Projections of older people with dementia and costs of dementia care in the United Kingdom, 2019–2040: Working paper [Internet]. London: Care Policy and Evaluation Centre; 2019 Nov [cited 2022 Jan 28].  
[https://www.alzheimers.org.uk/sites/default/files/2019-11/cpec\\_report\\_november\\_2019.pdf](https://www.alzheimers.org.uk/sites/default/files/2019-11/cpec_report_november_2019.pdf)
- <sup>3</sup> Lewis F, Karlsberg S, Sussex J, et al. Trajectory of dementia in the UK – making a difference: consulting report [Internet]. London: Office of Health Economics; 2014 Jun [cited 2022 Jan 28]. <https://www.alzheimersresearchuk.org/wp-content/uploads/2015/01/OHE-report-Full.pdf>
- <sup>4</sup> Gilhooly KJ, Gilhooly ML, Sullivan MP, et al. A meta-review of stress, coping and interventions in dementia and dementia caregiving. *BMC Geriatr*. 2016 May 18;16:106. doi: 10.1186/s12877-016-0280-8
- <sup>5</sup> Bremer P, Cabrera E, Leino-Kilpi H, et al. Informal dementia care: Consequences for caregivers' health and health care use in 8 European countries. *Health Policy*. 2015 Nov;119(11):1459-71. doi: 10.1016/j.healthpol.2015.09.014 [published Online First: 22 October 2022].
- <sup>6</sup> Pinquart M, Sörensen S. Differences between caregivers and noncaregivers in psychological health and physical health: a meta-analysis. *Psychol Aging*. 2003 Jun;18(2):250-67. doi: 10.1037/0882-7974.18.2.250

1  
2  
3 <sup>7</sup> McCabe M, You E, Tatangelo G. Hearing Their Voice: A Systematic Review of Dementia  
4 Family Caregivers' Needs. *Gerontologist*. 2016 Oct;56(5):e70-88. doi:  
5  
6 10.1093/geront/gnw078 [published Online First: 21 April 2016].  
7  
8

9  
10 <sup>8</sup> World Health Organization. Global action plan on the public health response to dementia  
11 2017–2025 [Internet]. Geneva: World Health Organization; 2017 [cited 2022 Jan 28].  
12  
13 [https://apps.who.int/iris/bitstream/handle/10665/259615/9789241513487-](https://apps.who.int/iris/bitstream/handle/10665/259615/9789241513487-eng.pdf?sequence=1)  
14  
15 [eng.pdf?sequence=1](https://apps.who.int/iris/bitstream/handle/10665/259615/9789241513487-eng.pdf?sequence=1)  
16  
17  
18

19  
20 <sup>9</sup> Dickinson C, Dow J, Gibson G, et al. Psychosocial intervention for carers of people with  
21 dementia: What components are most effective and when? A systematic review of systematic  
22 reviews. *Int Psychogeriatr*. 2017 Jan;29(1):31-43. doi: 10.1017/S1041610216001447  
23  
24 [published Online First: 26 September 2016].  
25  
26  
27

28  
29 <sup>10</sup> Masterson-Algar P, Allen MC, Hyde M, et al. Exploring the impact of Covid-19 on the  
30 care and quality of life of people with dementia and their carers: A scoping review.  
31  
32 *Dementia*. Published Online First: 1 November 2021.  
33  
34 <https://doi.org/10.1177/14713012211053971>  
35  
36  
37

38  
39 <sup>11</sup> Egan KJ, Pinto-Bruno AC, Bighelli I, et al. Online Training and Support Programs  
40 Designed to Improve Mental Health and Reduce Burden Among Caregivers of People With  
41 Dementia: A Systematic Review. *J Am Med Dir Assoc*. 2018 Mar;19(3):200-206.e1. doi:  
42  
43 10.1016/j.jamda.2017.10.023 [published Online First: 4 January 2018].  
44  
45  
46

47  
48 <sup>12</sup> Godwin KM, Mills WL, Anderson JA, et al. Technology-driven interventions for  
49 caregivers of persons with dementia: a systematic review. *Am J Alzheimers Dis Other*  
50 *Demen*. 2013 May;28(3):216-22. doi: 10.1177/1533317513481091 [published Online First:  
51  
52 25 March 2013].  
53  
54  
55  
56  
57  
58  
59  
60



- 1  
2  
3 13 Gitlin LN, Marx K, Stanley IH, et al. Translating Evidence-Based Dementia Caregiving  
4 Interventions into Practice: State-of-the-Science and Next Steps. *Gerontologist*. 2015  
5 Apr;55(2):210-26. doi: 10.1093/geront/gnu123 [published Online First: 17 February 2015].  
6  
7  
8  
9  
10  
11 14 Peterson K, Hahn H, Lee AJ, et al. In the Information Age, do dementia caregivers get the  
12 information they need? Semi-structured interviews to determine informal caregivers'  
13 education needs, barriers, and preferences. *BMC Geriatr*. 2016 Sep;16(164).  
14  
15  
16  
17  
18  
19  
20  
21 15 Christie HL, Martin JL, Connor J, et al. eHealth interventions to support caregivers of  
22 people with dementia may be proven effective, but are they implementation-ready? *Internet*  
23  
24  
25  
26  
27  
28  
29  
30  
31 16 Hopwood J, Walker N, McDonagh L, et al. Internet-Based Interventions Aimed at  
32 Supporting Family Caregivers of People With Dementia: Systematic Review. *J Med Internet*  
33  
34  
35  
36  
37  
38  
39  
40  
41  
42  
43 17 Pinto-Bruno AC, Pot AM, Kleiboer A, et al. An Online Minimally Guided Intervention to  
44 Support Family and Other Unpaid Carers of People With Dementia: Protocol for a  
45  
46  
47  
48  
49  
50  
51  
52  
53  
54  
55  
56  
57  
58  
59  
60  
19 Teles S, Ferreira A, Seeher K, et al. Online training and support program (iSupport) for  
informal dementia caregivers: protocol for an intervention study in Portugal. *BMC Geriatr*.  
2020 Jan;20(1):10. doi: 10.1186/s12877-019-1364-z

1  
2  
3 20 Baker JR, Jeon YH, Goodenough B, et al. What do children need to know about dementia?

4  
5 The perspectives of children and people with personal experience of dementia. *Int*

6  
7 *Psychogeriatr*. 2018 May;30(5):673-684. doi: 10.1017/S1041610217002022 [published

8  
9 Online First: 2 October 2017].

10  
11  
12  
13 21 National Institute for Health and Care Excellence (NICE). Methods for the development of

14  
15 NICE public health guidance [Internet]. 3rd ed. UK: NICE; c2006 [updated 2012 Sep; cited

16  
17 2022 Jan 28]. [https://www.nice.org.uk/process/pmg4/resources/methods-for-the-](https://www.nice.org.uk/process/pmg4/resources/methods-for-the-development-of-nice-public-health-guidance-third-edition-pdf-2007967445701)

18  
19  
20  
21  
22 development-of-nice-public-health-guidance-third-edition-pdf-2007967445701

23 22 Chan AW, Tetzlaff JM, Altman DG, et al. SPIRIT 2013 statement: defining standard

24  
25 protocol items for clinical trials. *Ann Intern Med*. 2013 Feb;158(3):200-7. doi: 10.7326/0003-

26  
27  
28  
29 4819-158-3-201302050-00583

30 23 Join Dementia Research is funded by the Department of Health and delivered by the

31  
32 National Institute for Health Research in partnership with Alzheimer Scotland, Alzheimer's

33  
34 Research UK and Alzheimer's Society. [www.joindementiaresearch.nihr.ac.uk](http://www.joindementiaresearch.nihr.ac.uk) [accessed

35  
36  
37  
38  
39 10/03/2021].

40 24 Deeken F, Rezo A, Hinz M, et al. Evaluation of Technology-Based Interventions for

41  
42 Informal Caregivers of Patients With Dementia-A Meta-Analysis of Randomized Controlled

43  
44  
45  
46  
47  
48  
49 Trials. *Am J Geriatr Psychiatry*. 2019 Apr;27(4):426-445. doi: 10.1016/j.jagp.2018.12.003.

Epub 2018 Dec 6. PMID: 30642650.

50 25 Sugimoto T, Sozu T, Hamasaki T. A convenient formula for sample size calculations in

51  
52  
53  
54  
55  
56  
57  
58  
59  
60 clinical trials with multiple co-primary continuous endpoints. *Pharm Stat*. 2012 Mar-

Apr;11(2):118-28. doi: 10.1002/pst.505

1  
2  
3 26 Sozu T, Sugimoto T, Hamasaki T, et al. Sample Size Determination in Clinical Trials with  
4 Multiple Endpoints. Springer International Publishing; 2015. <https://doi.org/10.1007/978-3->  
5  
6 319-22005-5  
7

8  
9  
10 27 Russell D, Hoare ZS, Whitaker R, et al. Generalized method for adaptive randomization in  
11 clinical trials. *Stat Med*. 2011 Apr;30(9):922-34. doi: 10.1002/sim.4175 [published Online  
12  
13 First: 1 February 2011].  
14  
15

16  
17 28 Sörensen S, Pinguat M, Duberstein P. How effective are interventions with caregivers? An  
18 updated meta-analysis. *Gerontologist*. 2002 Jun;42(3):356-72. doi: 10.1093/geront/42.3.356  
19  
20  
21

22  
23 29 Kitwood T. Dementia reconsidered: The person comes first. UK: Open University Press;  
24 1997.  
25  
26

27  
28 30 Pot AM, Gallagher-Thompson D, Xiao LD, et al. iSupport: a WHO global online  
29 intervention for informal caregivers of people with dementia. *World Psychiatry*. 2019  
30  
31 Oct;18(3):365-366. doi: 10.1002/wps.20684  
32  
33  
34

35  
36 31 Office for National Statistics (ONS). 2011 Census: Key statistics for Wales, March 2011  
37 [Internet]. UK: ONS; 2012 Dec. Section 10. Proficiency in Welsh; [cited 2022 Jan 28];  
38  
39 <https://www.ons.gov.uk/peoplepopulationandcommunity/populationandmigration/population>  
40  
41  
42  
43  
44  
45  
46  
47  
48  
49  
50  
51  
52  
53  
54  
55  
56  
57  
58  
59  
60

56 32 Alzheimer's Society. Caring for a person with dementia: A practical guide. London:  
57 Alzheimer's Society, 2002 [reviewed 2019]. Available from:  
58  
59 [https://www.alzheimers.org.uk/get-support/publications-factsheets/caring-person-dementia-](https://www.alzheimers.org.uk/get-support/publications-factsheets/caring-person-dementia-practical-guide)  
60  
61  
62  
63  
64  
65  
66  
67  
68  
69  
70  
71  
72  
73  
74  
75  
76  
77  
78  
79  
80  
81  
82  
83  
84  
85  
86  
87  
88  
89  
90  
91  
92  
93  
94  
95  
96  
97  
98  
99  
100  
101  
102  
103  
104  
105  
106  
107  
108  
109  
110  
111  
112  
113  
114  
115  
116  
117  
118  
119  
120  
121  
122  
123  
124  
125  
126  
127  
128  
129  
130  
131  
132  
133  
134  
135  
136  
137  
138  
139  
140  
141  
142  
143  
144  
145  
146  
147  
148  
149  
150  
151  
152  
153  
154  
155  
156  
157  
158  
159  
160  
161  
162  
163  
164  
165  
166  
167  
168  
169  
170  
171  
172  
173  
174  
175  
176  
177  
178  
179  
180  
181  
182  
183  
184  
185  
186  
187  
188  
189  
190  
191  
192  
193  
194  
195  
196  
197  
198  
199  
200  
201  
202  
203  
204  
205  
206  
207  
208  
209  
210  
211  
212  
213  
214  
215  
216  
217  
218  
219  
220  
221  
222  
223  
224  
225  
226  
227  
228  
229  
230  
231  
232  
233  
234  
235  
236  
237  
238  
239  
240  
241  
242  
243  
244  
245  
246  
247  
248  
249  
250  
251  
252  
253  
254  
255  
256  
257  
258  
259  
260  
261  
262  
263  
264  
265  
266  
267  
268  
269  
270  
271  
272  
273  
274  
275  
276  
277  
278  
279  
280  
281  
282  
283  
284  
285  
286  
287  
288  
289  
290  
291  
292  
293  
294  
295  
296  
297  
298  
299  
300  
301  
302  
303  
304  
305  
306  
307  
308  
309  
310  
311  
312  
313  
314  
315  
316  
317  
318  
319  
320  
321  
322  
323  
324  
325  
326  
327  
328  
329  
330  
331  
332  
333  
334  
335  
336  
337  
338  
339  
340  
341  
342  
343  
344  
345  
346  
347  
348  
349  
350  
351  
352  
353  
354  
355  
356  
357  
358  
359  
360  
361  
362  
363  
364  
365  
366  
367  
368  
369  
370  
371  
372  
373  
374  
375  
376  
377  
378  
379  
380  
381  
382  
383  
384  
385  
386  
387  
388  
389  
390  
391  
392  
393  
394  
395  
396  
397  
398  
399  
400  
401  
402  
403  
404  
405  
406  
407  
408  
409  
410  
411  
412  
413  
414  
415  
416  
417  
418  
419  
420  
421  
422  
423  
424  
425  
426  
427  
428  
429  
430  
431  
432  
433  
434  
435  
436  
437  
438  
439  
440  
441  
442  
443  
444  
445  
446  
447  
448  
449  
450  
451  
452  
453  
454  
455  
456  
457  
458  
459  
460  
461  
462  
463  
464  
465  
466  
467  
468  
469  
470  
471  
472  
473  
474  
475  
476  
477  
478  
479  
480  
481  
482  
483  
484  
485  
486  
487  
488  
489  
490  
491  
492  
493  
494  
495  
496  
497  
498  
499  
500  
501  
502  
503  
504  
505  
506  
507  
508  
509  
510  
511  
512  
513  
514  
515  
516  
517  
518  
519  
520  
521  
522  
523  
524  
525  
526  
527  
528  
529  
530  
531  
532  
533  
534  
535  
536  
537  
538  
539  
540  
541  
542  
543  
544  
545  
546  
547  
548  
549  
550  
551  
552  
553  
554  
555  
556  
557  
558  
559  
560  
561  
562  
563  
564  
565  
566  
567  
568  
569  
570  
571  
572  
573  
574  
575  
576  
577  
578  
579  
580  
581  
582  
583  
584  
585  
586  
587  
588  
589  
590  
591  
592  
593  
594  
595  
596  
597  
598  
599  
600  
601  
602  
603  
604  
605  
606  
607  
608  
609  
610  
611  
612  
613  
614  
615  
616  
617  
618  
619  
620  
621  
622  
623  
624  
625  
626  
627  
628  
629  
630  
631  
632  
633  
634  
635  
636  
637  
638  
639  
640  
641  
642  
643  
644  
645  
646  
647  
648  
649  
650  
651  
652  
653  
654  
655  
656  
657  
658  
659  
660  
661  
662  
663  
664  
665  
666  
667  
668  
669  
670  
671  
672  
673  
674  
675  
676  
677  
678  
679  
680  
681  
682  
683  
684  
685  
686  
687  
688  
689  
690  
691  
692  
693  
694  
695  
696  
697  
698  
699  
700  
701  
702  
703  
704  
705  
706  
707  
708  
709  
710  
711  
712  
713  
714  
715  
716  
717  
718  
719  
720  
721  
722  
723  
724  
725  
726  
727  
728  
729  
730  
731  
732  
733  
734  
735  
736  
737  
738  
739  
740  
741  
742  
743  
744  
745  
746  
747  
748  
749  
750  
751  
752  
753  
754  
755  
756  
757  
758  
759  
760  
761  
762  
763  
764  
765  
766  
767  
768  
769  
770  
771  
772  
773  
774  
775  
776  
777  
778  
779  
780  
781  
782  
783  
784  
785  
786  
787  
788  
789  
790  
791  
792  
793  
794  
795  
796  
797  
798  
799  
800  
801  
802  
803  
804  
805  
806  
807  
808  
809  
810  
811  
812  
813  
814  
815  
816  
817  
818  
819  
820  
821  
822  
823  
824  
825  
826  
827  
828  
829  
830  
831  
832  
833  
834  
835  
836  
837  
838  
839  
840  
841  
842  
843  
844  
845  
846  
847  
848  
849  
850  
851  
852  
853  
854  
855  
856  
857  
858  
859  
860  
861  
862  
863  
864  
865  
866  
867  
868  
869  
870  
871  
872  
873  
874  
875  
876  
877  
878  
879  
880  
881  
882  
883  
884  
885  
886  
887  
888  
889  
890  
891  
892  
893  
894  
895  
896  
897  
898  
899  
900  
901  
902  
903  
904  
905  
906  
907  
908  
909  
910  
911  
912  
913  
914  
915  
916  
917  
918  
919  
920  
921  
922  
923  
924  
925  
926  
927  
928  
929  
930  
931  
932  
933  
934  
935  
936  
937  
938  
939  
940  
941  
942  
943  
944  
945  
946  
947  
948  
949  
950  
951  
952  
953  
954  
955  
956  
957  
958  
959  
960  
961  
962  
963  
964  
965  
966  
967  
968  
969  
970  
971  
972  
973  
974  
975  
976  
977  
978  
979  
980  
981  
982  
983  
984  
985  
986  
987  
988  
989  
990  
991  
992  
993  
994  
995  
996  
997  
998  
999  
1000

33 Elsevier Ltd. MACRO (Version 4.9.0.8594) [Computer software]. London; c2018

- 1  
2  
3 34 Vasileiou K, Barnett J, Thorpe S, et al. Characterising and justifying sample size  
4  
5 sufficiency in interview-based studies: systematic analysis of qualitative health research over  
6  
7 a 15-year period. *BMC Med Res Methodol*. 2018 Nov;18(1):148. doi: 10.1186/s12874-018-  
8  
9 0594-7  
10  
11  
12  
13 35 Ritchie J, Lewis J, Elam G. Designing and selecting samples. In: Ritchie J, Lewis J,  
14  
15 editors. *Qualitative research practice: a guide for social science students and researchers*.  
16  
17 London: SAGE Publications Ltd.; 2003. p.77–108.  
18  
19  
20 36 Moore GF, Audrey S, Barker M, et al. Process evaluation of complex interventions:  
21  
22 Medical Research Council guidance. *BMJ*. 2015 Mar;350:h1258. doi: 10.1136/bmj.h1258  
23  
24  
25  
26 37 O'Cathain A, Croot L, Duncan E, et al. Guidance on how to develop complex interventions  
27  
28 to improve health and healthcare. *BMJ Open*. 2019 Aug;9(8):e029954. doi:  
29  
30 10.1136/bmjopen-2019-029954  
31  
32  
33 38 May C, Finch T, Mair F, et al. Understanding the implementation of complex interventions  
34  
35 in health care: the normalization process model. *BMC Health Serv Res*. 2007 Sep;7:148. doi:  
36  
37 10.1186/1472-6963-7-148  
38  
39  
40 39 Brooke J. SUS: A 'quick and dirty' usability scale. In: Jordan PW, Thomas B,  
41  
42 Weerdmeester BA, McClelland IL, editors. *Usability Evaluation in Industry*. London: Taylor  
43  
44 Francis; 1996:189–94.  
45  
46  
47  
48 40 Lancaster GA, Dodd S, Williamson PR. Design and analysis of pilot studies:  
49  
50 recommendations for good practice. *J Eval Clin Pract*. 2004 May;10(2):307-12. doi:  
51  
52 10.1111/j..2002.384.doc.x  
53  
54  
55  
56 41 Braun V, Clarke V. Using thematic analysis in psychology. *Qual Res Psychol*. 2006;3(2):  
57  
58 77-101. doi: 10.1191/1478088706qp063oa  
59  
60

1  
2  
3 42 Pfadenhauer LM, Gerhardus A, Mozygemba K, et al. Making sense of complexity in  
4 context and implementation: the Context and Implementation of Complex Interventions  
5 (CICI) framework. *Implement Sci*. 2017 Feb;12(1):21. doi: 10.1186/s13012-017-0552-5  
6  
7

8  
9  
10 43 Fenwick E, O'Brien BJ, Briggs A. Cost-effectiveness acceptability curves--facts, fallacies  
11 and frequently asked questions. *Health Econ*. 2004 May;13(5):405-15. doi: 10.1002/hec.903  
12  
13

14  
15 44 Wiltsey Stirman S, Baumann AA, Miller CJ. The FRAME: an expanded framework for  
16 reporting adaptations and modifications to evidence-based interventions. *Implement Sci*. 2019  
17 Jun;14(1):58. doi: 10.1186/s13012-019-0898-y  
18  
19

20  
21 45 Dementia Engagement and Empowerment Project (DEEP). The DEEP-Ethics Gold  
22 Standards for Dementia Research [Internet]. Version 1. Exeter (UK): Innovations in  
23 Dementia; 2020 [cited 2022 Jan 28]. [https://www.dementiavoices.org.uk/wp-](https://www.dementiavoices.org.uk/wp-content/uploads/2020/07/The-DEEP-Ethics-Gold-Standards-for-Dementia-Research.pdf)  
24  
25  
26  
27  
28  
29  
30  
31  
32  
33  
34  
35  
36  
37  
38  
39  
40

41 46 Eysenbach G; CONSORT-EHEALTH Group. CONSORT-EHEALTH: improving and  
42 standardizing evaluation reports of Web-based and mobile health interventions. *J Med*  
43  
44  
45  
46  
47  
48  
49  
50  
51  
52  
53  
54  
55  
56  
57  
58  
59  
60

41 47 Husereau D, Drummond M, Augustovski F, et al. Consolidated Health Economic  
42 Evaluation Reporting Standards 2022 (CHEERS 2022) Statement: Updated Reporting  
43 Guidance for Health Economic Evaluations. *Value Health*. 2022 Jan;25(1):3-9. doi:  
44  
45  
46  
47  
48  
49  
50  
51  
52  
53  
54  
55  
56  
57  
58  
59  
60

51 <sup>i</sup> Bédard M, Molloy DW, Squire L, et al. The Zarit Burden Interview: a new short version and  
52 screening version. *Gerontologist*. 2001 Oct;41(5):652-7. doi: 10.1093/geront/41.5.652.  
53  
54  
55  
56  
57  
58  
59  
60

- 1  
2  
3 ii Andresen EM, Byers K, Friary J, et al. Performance of the 10-item Center for  
4  
5  
6 Epidemiologic Studies Depression scale for caregiving research. *SAGE Open Med.* 2013  
7  
8  
9 Dec;1:2050312113514576. doi: 10.1177/2050312113514576.  
10  
11  
12 iii Herdman M, Gudex C, Lloyd A, et al. Development and preliminary testing of the new  
13  
14 five-level version of EQ-5D (EQ-5D-5L). *Qual Life Res.* 2011 Dec;20(10):1727-36. doi:  
15  
16 10.1007/s11136-011-9903-x [published Online First: 09 April 2011].  
17  
18  
19  
20 iv Wagnild G. The Resilience Scale User's Guide for the US English version of the Resilience  
21  
22 Scale and the 14-item Resilience Scale (RS-14). Worden, MT: The Resilience Center; 2009.  
23  
24  
25  
26 v Spitzer RL, Kroenke K, Williams JB, et al. A brief measure for assessing generalized  
27  
28 anxiety disorder: the GAD-7. *Arch Intern Med.* 2006 May;166(10):1092-7. doi:  
29  
30 10.1001/archinte.166.10.1092.  
31  
32  
33  
34 vi Annear MJ, Toye C, Elliott KJ, et al. Dementia knowledge assessment scale (DKAS):  
35  
36 confirmatory factor analysis and comparative subscale scores among an international cohort.  
37  
38  
39  
40 *BMC Geriatr.* 2017 Jul;17(1):168. doi: 10.1186/s12877-017-0552-y.  
41  
42  
43  
44  
45  
46  
47  
48  
49  
50  
51  
52  
53  
54  
55  
56  
57  
58  
59  
60  
57  
58  
59  
60  
vii Hoefman RJ, Van Exel NJA, Brouwer WBF. iMTA Valuation of Informal Care  
Questionnaire (iVICQ). Version 1.0 (December 2011). Rotterdam: iBMG / iMTA, 2011.  
viii Spruytte N, Van Audenhove C, Lammertyn F. The Scale for the Quality of the Current  
Relationship. Internal Report. Leuven: LUCAS-KULeuven; 2000.  
ix Mulhern B, Rowen D, Brazier J, et al. Development of DEMQOL-U and DEMQOL-  
PROXY-U: generation of preference-based indices from DEMQOL and DEMQOL-PROXY

1  
2  
3 for use in economic evaluation. *Health Technol Assess*. 2013 Feb;17(5):v-xv, 1-140. doi:  
4  
5  
6 10.3310/hta17050.  
7

## 8 9 **Figures**

10  
11  
12 Figure 1. iSupport content.  
13

14  
15 Figure 2. Recruitment flowchart.  
16  
17  
18  
19  
20  
21  
22  
23  
24  
25  
26  
27  
28  
29  
30  
31  
32  
33  
34  
35  
36  
37  
38  
39  
40  
41  
42  
43  
44  
45  
46  
47  
48  
49  
50  
51  
52  
53  
54  
55  
56  
57  
58  
59  
60

For peer review only

Figure 1: The content of iSupport for dementia carers

1  
2  
3  
4  
5  
6  
7  
8  
9  
10  
11  
12  
13  
14  
15  
16  
17  
18  
19  
20  
21  
22  
23  
24  
25  
26  
27  
28  
29  
30  
31  
32  
33  
34  
35  
36  
37  
38  
39  
40  
41

# iSupport

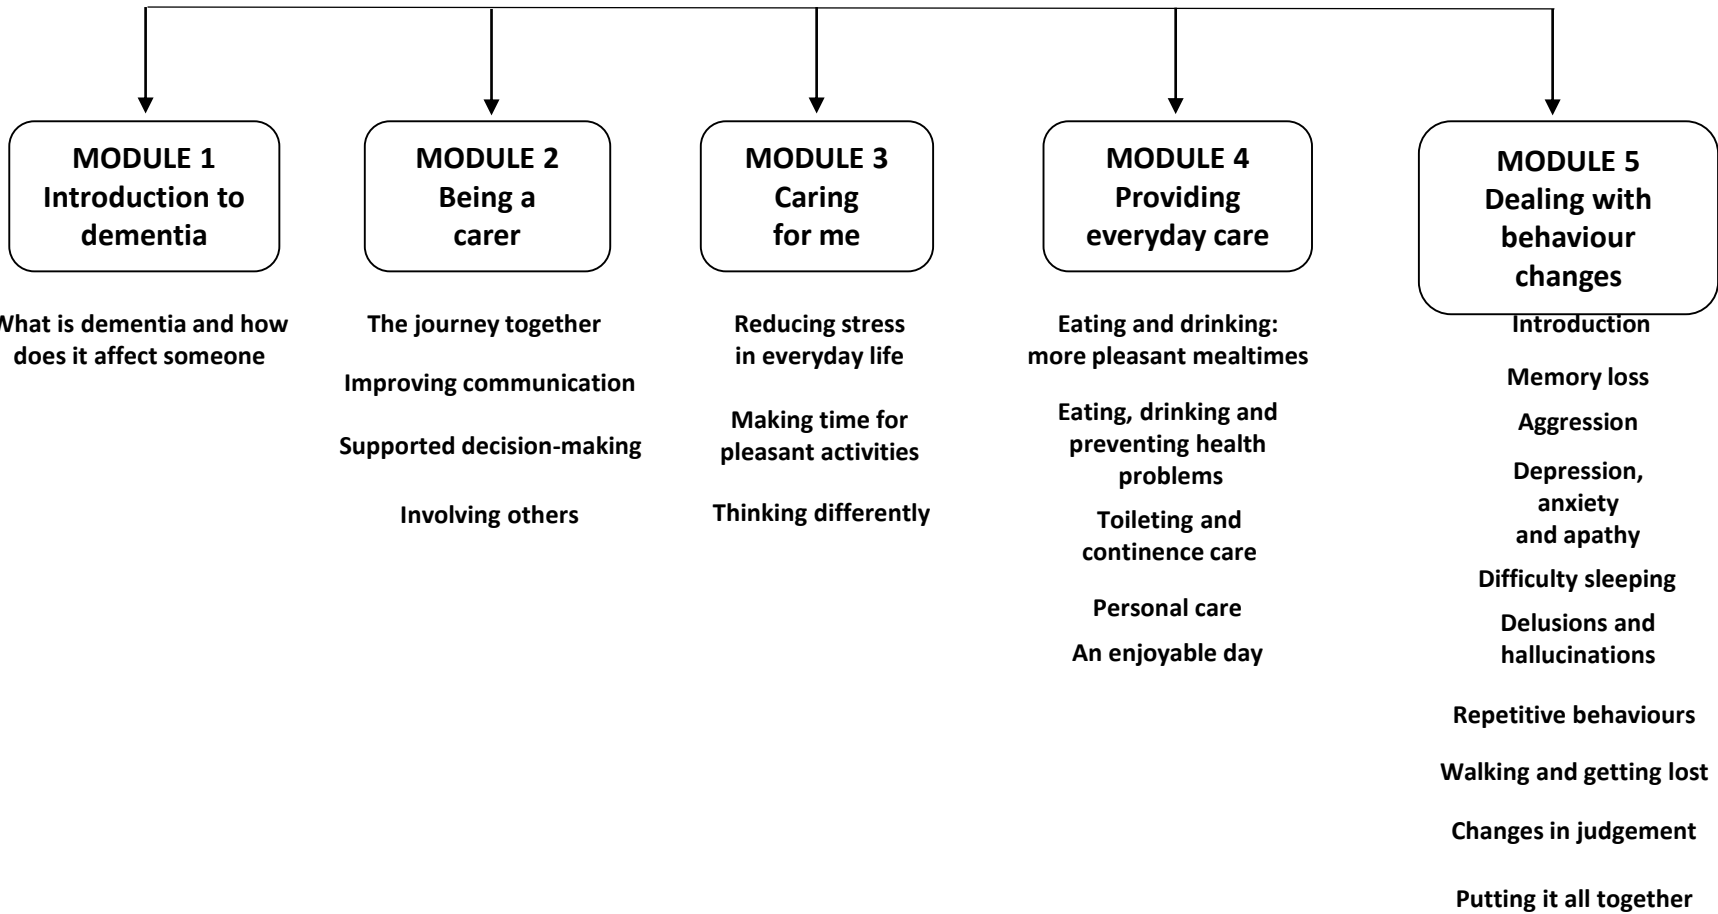



Figure 2: Recruitment flow chart

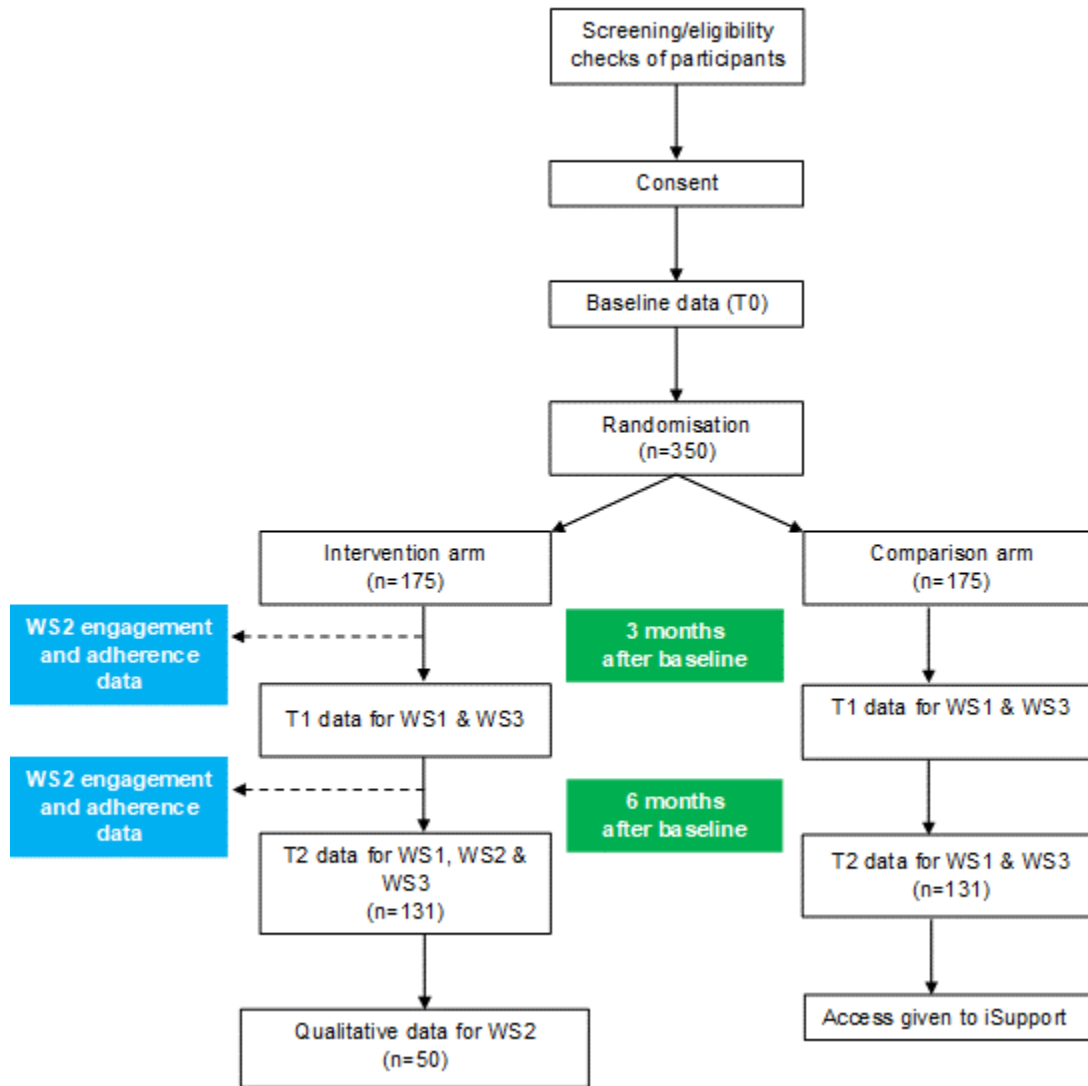

only

## Supplementary Material

### File 1 Objectives for each work-stream

WS1. A definitive pragmatic individually randomised controlled trial across Wales, Scotland and England, with a six-month nested internal pilot. This will:

- Determine progression of the definitive trial based on a go/review/stop criteria (nested internal pilot).
- Determine the effectiveness of ‘iSupport’ in reducing symptoms of distress and/or depression.
- Determine the effectiveness of ‘iSupport’ in reducing symptoms of anxiety.
- Determine the effectiveness of ‘iSupport’ in improving dementia knowledge, relationship quality and resilience.
- Describe the trial sample according to demographic/socioeconomic characteristics.

WS2. A process evaluation will be conducted in line with the established guidelines for process evaluations of complex evaluations<sup>15,16</sup> to determine the barriers and facilitators to the implementation of ‘iSupport’ at scale, and the extent it supports carers in the face of the ongoing or future COVID-19 pandemic. This will:

- Determine participant engagement and adherence to ‘iSupport’.
- Explore the mechanisms of change.
- Identify the external factors to ‘iSupport’ which influence the delivery and function of the intervention.
- Explore the contextual factors that influence the scalability of ‘iSupport’ into wider contexts using the CICI framework.<sup>17</sup>

WS3. A parallel cost-effectiveness analysis, undertaken from both a public sector perspective (NHS, personal social services and local authorities), and a societal perspective (public sector plus opportunity costs). This will:

- Calculate the costs of implementing ‘iSupport’, including technical support and time spent supporting carers to use the tool.
- Explore patterns of, and estimate the cost of, health and social care resource use for carers in the ‘iSupport’ and comparison arms of the trial.
- Explore patterns of, and estimate the cost of, health and social care resource use for the care recipients of carers in the trial.
- Explore the opportunity cost of informal care through the measurement of informal care time, types of care task, impacts on carer’s leisure and employment hours, and carers’ willingness to pay for more support.
- Using QALYs derived from the EQ-5D-5L, determine the cost-effectiveness of ‘iSupport’ compared to the control condition; conduct secondary cost-effectiveness analyses using the Zarit Burden Interview<sup>18</sup> and the Centre for Epidemiological Studies of Depression Scale (CES-D10).<sup>19,20</sup>

## File 2 Recruitment process

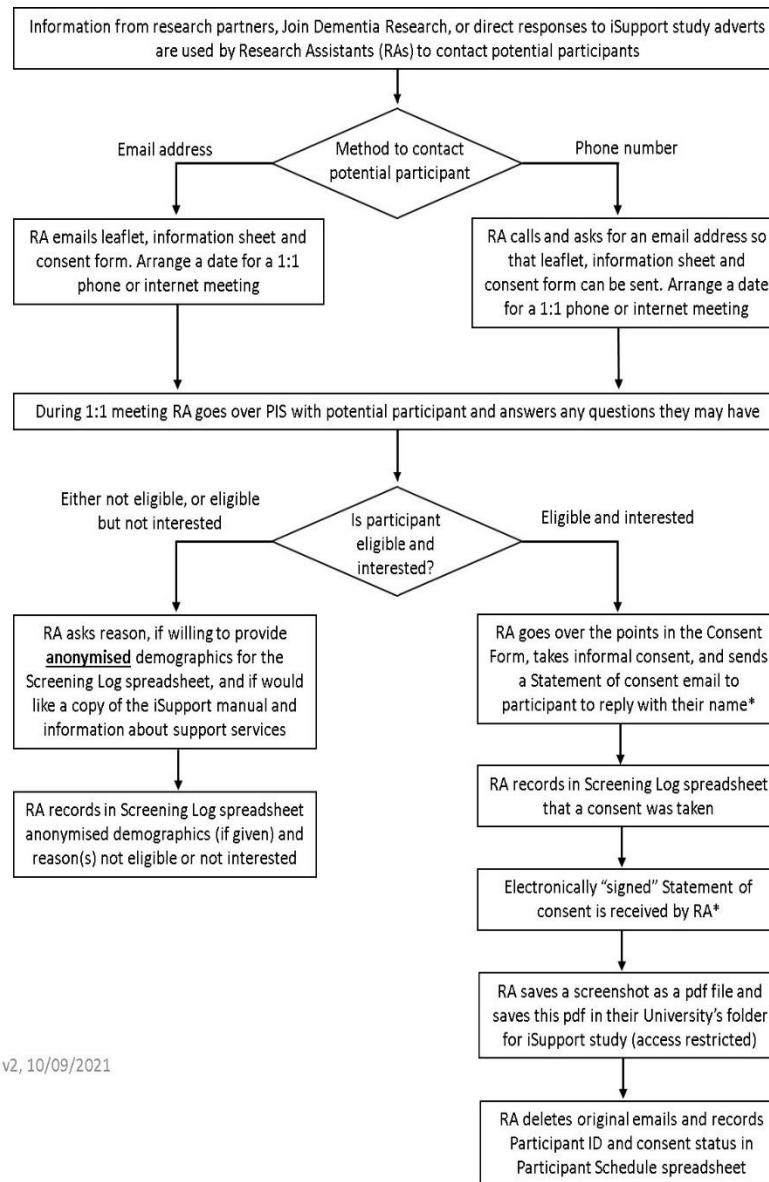

N.B. In the event participants request hard copies or prefer not to use email, paper versions of documents will be posted to their address and the process for taking consent would slightly differ: The participant would sign while on the phone with the researcher, return their signed consent form to the researcher for scanning, and a copy would then be returned to the participant.

iSupport consent flowchart v2, 10/09/2021

**File 3 Feasibility study flowchart**

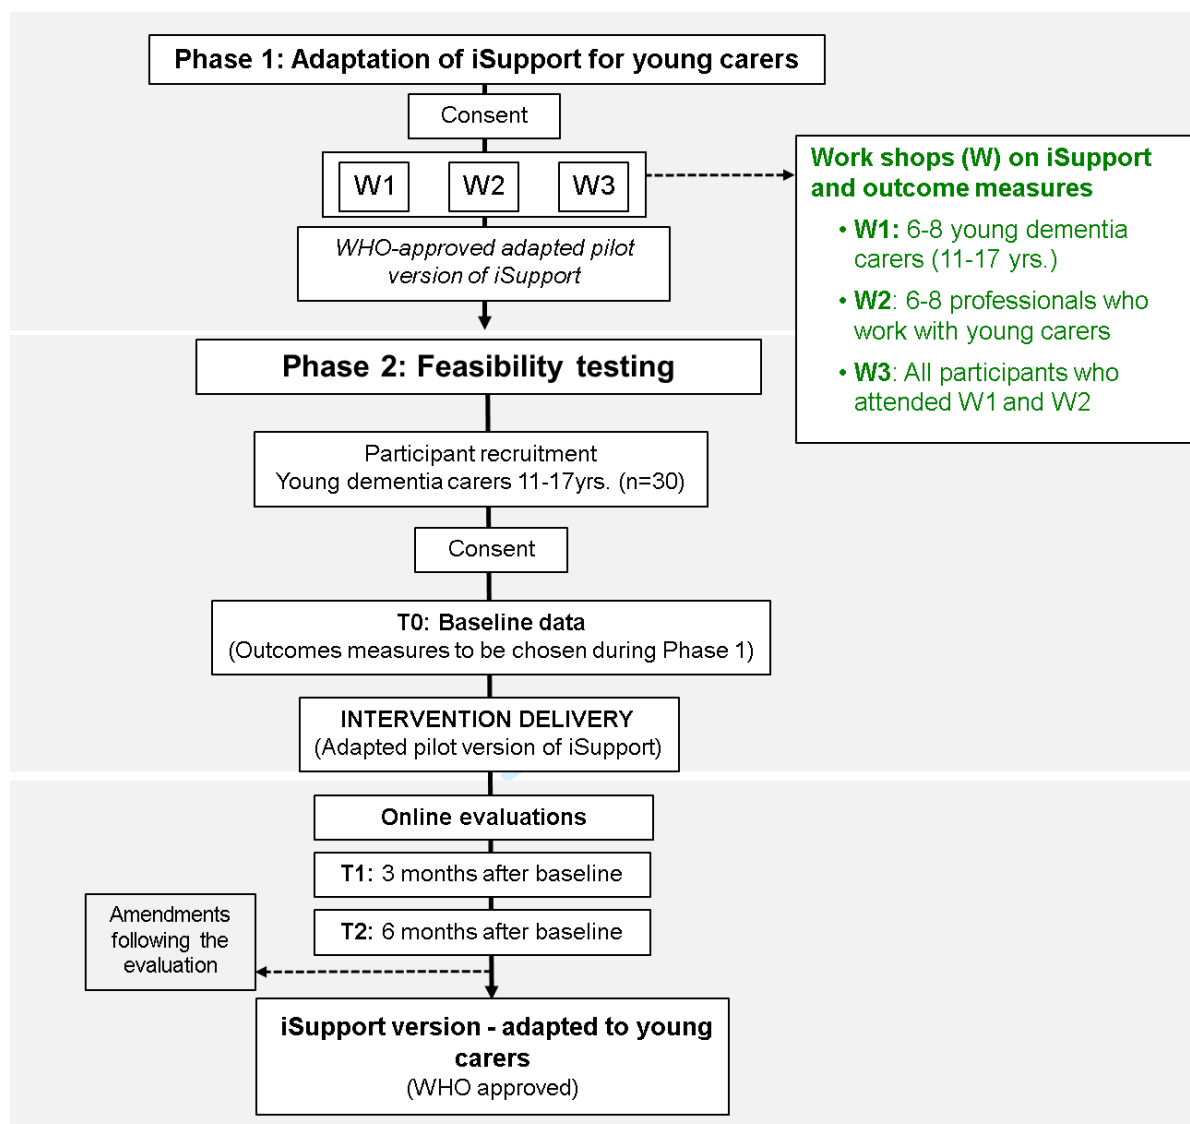

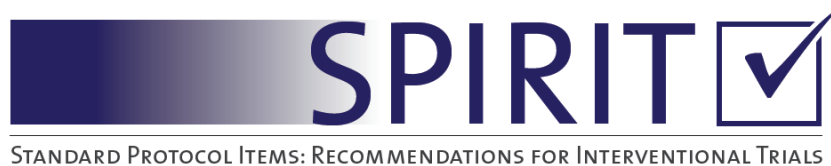

SPIRIT 2013 Checklist: Recommended items to address in a clinical trial protocol and related documents\*

| Section/item                      | Item No | Description                                                                                                                                                                                                                                                                              |
|-----------------------------------|---------|------------------------------------------------------------------------------------------------------------------------------------------------------------------------------------------------------------------------------------------------------------------------------------------|
| <b>Administrative information</b> |         |                                                                                                                                                                                                                                                                                          |
| ✓ Title                           | 1       | Descriptive title identifying the study design, population, interventions, and, if applicable, trial acronym                                                                                                                                                                             |
| ✓ Trial registration              | 2a      | Trial identifier and registry name. If not yet registered, name of intended registry                                                                                                                                                                                                     |
| ✓                                 | 2b      | All items from the World Health Organization Trial Registration Data Set                                                                                                                                                                                                                 |
| ✓ Protocol version                | 3       | Date and version identifier                                                                                                                                                                                                                                                              |
| ✓ Funding                         | 4       | Sources and types of financial, material, and other support                                                                                                                                                                                                                              |
| ✓ Roles and responsibilities      | 5a      | Names, affiliations, and roles of protocol contributors                                                                                                                                                                                                                                  |
| ✓                                 | 5b      | Name and contact information for the trial sponsor                                                                                                                                                                                                                                       |
| ✓                                 | 5c      | Role of study sponsor and funders, if any, in study design; collection, management, analysis, and interpretation of data; writing of the report; and the decision to submit the report for publication, including whether they will have ultimate authority over any of these activities |
| ✓                                 | 5d      | Composition, roles, and responsibilities of the coordinating centre, steering committee, endpoint adjudication committee, data management team, and other individuals or groups overseeing the trial, if applicable (see Item 21a for data monitoring committee)                         |
| <b>Introduction</b>               |         |                                                                                                                                                                                                                                                                                          |
| ✓ Background and rationale        | 6a      | Description of research question and justification for undertaking the trial, including summary of relevant studies (published and unpublished) examining benefits and harms for each intervention                                                                                       |
| ✓                                 | 6b      | Explanation for choice of comparators                                                                                                                                                                                                                                                    |
| ✓ Objectives                      | 7       | Specific objectives or hypotheses                                                                                                                                                                                                                                                        |
| ✓ Trial design                    | 8       | Description of trial design including type of trial (eg, parallel group, crossover, factorial, single group), allocation ratio, and framework (eg, superiority, equivalence, noninferiority, exploratory)                                                                                |

## Methods: Participants, interventions, and outcomes

|    |   |                      |                                                                                                                                                                                                                                                                                                                                                                                   |
|----|---|----------------------|-----------------------------------------------------------------------------------------------------------------------------------------------------------------------------------------------------------------------------------------------------------------------------------------------------------------------------------------------------------------------------------|
| 1  |   |                      |                                                                                                                                                                                                                                                                                                                                                                                   |
| 2  |   |                      |                                                                                                                                                                                                                                                                                                                                                                                   |
| 3  |   |                      |                                                                                                                                                                                                                                                                                                                                                                                   |
| 4  | ✓ | Study setting        | 9 Description of study settings (eg, community clinic, academic hospital) and list of countries where data will be collected. Reference to where list of study sites can be obtained                                                                                                                                                                                              |
| 5  |   |                      |                                                                                                                                                                                                                                                                                                                                                                                   |
| 6  |   |                      |                                                                                                                                                                                                                                                                                                                                                                                   |
| 7  |   |                      |                                                                                                                                                                                                                                                                                                                                                                                   |
| 8  | ✓ | Eligibility criteria | 10 Inclusion and exclusion criteria for participants. If applicable, eligibility criteria for study centres and individuals who will perform the interventions (eg, surgeons, psychotherapists)                                                                                                                                                                                   |
| 9  |   |                      |                                                                                                                                                                                                                                                                                                                                                                                   |
| 10 |   |                      |                                                                                                                                                                                                                                                                                                                                                                                   |
| 11 |   |                      |                                                                                                                                                                                                                                                                                                                                                                                   |
| 12 |   |                      |                                                                                                                                                                                                                                                                                                                                                                                   |
| 13 | ✓ | Interventions        | 11a Interventions for each group with sufficient detail to allow replication, including how and when they will be administered                                                                                                                                                                                                                                                    |
| 14 |   |                      |                                                                                                                                                                                                                                                                                                                                                                                   |
| 15 |   |                      |                                                                                                                                                                                                                                                                                                                                                                                   |
| 16 |   |                      |                                                                                                                                                                                                                                                                                                                                                                                   |
| 17 | ✓ |                      | 11b Criteria for discontinuing or modifying allocated interventions for a given trial participant (eg, drug dose change in response to harms, participant request, or improving/worsening disease)                                                                                                                                                                                |
| 18 |   |                      |                                                                                                                                                                                                                                                                                                                                                                                   |
| 19 |   |                      |                                                                                                                                                                                                                                                                                                                                                                                   |
| 20 |   |                      |                                                                                                                                                                                                                                                                                                                                                                                   |
| 21 | ✓ |                      | 11c Strategies to improve adherence to intervention protocols, and any procedures for monitoring adherence (eg, drug tablet return, laboratory tests)                                                                                                                                                                                                                             |
| 22 |   |                      |                                                                                                                                                                                                                                                                                                                                                                                   |
| 23 |   |                      |                                                                                                                                                                                                                                                                                                                                                                                   |
| 24 |   |                      |                                                                                                                                                                                                                                                                                                                                                                                   |
| 25 | ✓ |                      | 11d Relevant concomitant care and interventions that are permitted or prohibited during the trial                                                                                                                                                                                                                                                                                 |
| 26 |   |                      |                                                                                                                                                                                                                                                                                                                                                                                   |
| 27 |   |                      |                                                                                                                                                                                                                                                                                                                                                                                   |
| 28 |   | Outcomes             | 12 Primary, secondary, and other outcomes, including the specific measurement variable (eg, systolic blood pressure), analysis metric (eg, change from baseline, final value, time to event), method of aggregation (eg, median, proportion), and time point for each outcome. Explanation of the clinical relevance of chosen efficacy and harm outcomes is strongly recommended |
| 29 | ✓ |                      |                                                                                                                                                                                                                                                                                                                                                                                   |
| 30 |   |                      |                                                                                                                                                                                                                                                                                                                                                                                   |
| 31 |   |                      |                                                                                                                                                                                                                                                                                                                                                                                   |
| 32 |   |                      |                                                                                                                                                                                                                                                                                                                                                                                   |
| 33 |   |                      |                                                                                                                                                                                                                                                                                                                                                                                   |
| 34 |   |                      |                                                                                                                                                                                                                                                                                                                                                                                   |
| 35 |   |                      |                                                                                                                                                                                                                                                                                                                                                                                   |
| 36 | ✓ | Participant timeline | 13 Time schedule of enrolment, interventions (including any run-ins and washouts), assessments, and visits for participants. A schematic diagram is highly recommended (see Figure)                                                                                                                                                                                               |
| 37 |   |                      |                                                                                                                                                                                                                                                                                                                                                                                   |
| 38 |   |                      |                                                                                                                                                                                                                                                                                                                                                                                   |
| 39 |   |                      |                                                                                                                                                                                                                                                                                                                                                                                   |
| 40 |   |                      |                                                                                                                                                                                                                                                                                                                                                                                   |
| 41 | ✓ | Sample size          | 14 Estimated number of participants needed to achieve study objectives and how it was determined, including clinical and statistical assumptions supporting any sample size calculations                                                                                                                                                                                          |
| 42 |   |                      |                                                                                                                                                                                                                                                                                                                                                                                   |
| 43 |   |                      |                                                                                                                                                                                                                                                                                                                                                                                   |
| 44 |   |                      |                                                                                                                                                                                                                                                                                                                                                                                   |
| 45 | ✓ | Recruitment          | 15 Strategies for achieving adequate participant enrolment to reach target sample size                                                                                                                                                                                                                                                                                            |
| 46 |   |                      |                                                                                                                                                                                                                                                                                                                                                                                   |
| 47 |   |                      |                                                                                                                                                                                                                                                                                                                                                                                   |

## Methods: Assignment of interventions (for controlled trials)

### Allocation:

|    |   |                     |                                                                                                                                                                                                                                                                                                                                                              |
|----|---|---------------------|--------------------------------------------------------------------------------------------------------------------------------------------------------------------------------------------------------------------------------------------------------------------------------------------------------------------------------------------------------------|
| 51 |   |                     |                                                                                                                                                                                                                                                                                                                                                              |
| 52 |   |                     |                                                                                                                                                                                                                                                                                                                                                              |
| 53 | ✓ | Sequence generation | 16a Method of generating the allocation sequence (eg, computer-generated random numbers), and list of any factors for stratification. To reduce predictability of a random sequence, details of any planned restriction (eg, blocking) should be provided in a separate document that is unavailable to those who enrol participants or assign interventions |
| 54 |   |                     |                                                                                                                                                                                                                                                                                                                                                              |
| 55 |   |                     |                                                                                                                                                                                                                                                                                                                                                              |
| 56 |   |                     |                                                                                                                                                                                                                                                                                                                                                              |
| 57 |   |                     |                                                                                                                                                                                                                                                                                                                                                              |
| 58 |   |                     |                                                                                                                                                                                                                                                                                                                                                              |
| 59 |   |                     |                                                                                                                                                                                                                                                                                                                                                              |
| 60 |   |                     |                                                                                                                                                                                                                                                                                                                                                              |

|    |   |                                  |     |                                                                                                                                                                                                           |
|----|---|----------------------------------|-----|-----------------------------------------------------------------------------------------------------------------------------------------------------------------------------------------------------------|
| 1  |   |                                  |     |                                                                                                                                                                                                           |
| 2  | ✓ | Allocation concealment mechanism | 16b | Mechanism of implementing the allocation sequence (eg, central telephone; sequentially numbered, opaque, sealed envelopes), describing any steps to conceal the sequence until interventions are assigned |
| 3  |   |                                  |     |                                                                                                                                                                                                           |
| 4  |   |                                  |     |                                                                                                                                                                                                           |
| 5  |   |                                  |     |                                                                                                                                                                                                           |
| 6  |   |                                  |     |                                                                                                                                                                                                           |
| 7  | ✓ | Implementation                   | 16c | Who will generate the allocation sequence, who will enrol participants, and who will assign participants to interventions                                                                                 |
| 8  |   |                                  |     |                                                                                                                                                                                                           |
| 9  |   |                                  |     |                                                                                                                                                                                                           |
| 10 |   |                                  |     |                                                                                                                                                                                                           |
| 11 | ✓ | Blinding (masking)               | 17a | Who will be blinded after assignment to interventions (eg, trial participants, care providers, outcome assessors, data analysts), and how                                                                 |
| 12 |   |                                  |     |                                                                                                                                                                                                           |
| 13 |   |                                  |     |                                                                                                                                                                                                           |
| 14 |   |                                  |     |                                                                                                                                                                                                           |
| 15 | ✓ |                                  | 17b | If blinded, circumstances under which unblinding is permissible, and procedure for revealing a participant's allocated intervention during the trial                                                      |
| 16 |   |                                  |     |                                                                                                                                                                                                           |
| 17 |   |                                  |     |                                                                                                                                                                                                           |
| 18 |   |                                  |     |                                                                                                                                                                                                           |

### Methods: Data collection, management, and analysis

|    |   |                         |     |                                                                                                                                                                                                                                                                                                                                                                                                              |
|----|---|-------------------------|-----|--------------------------------------------------------------------------------------------------------------------------------------------------------------------------------------------------------------------------------------------------------------------------------------------------------------------------------------------------------------------------------------------------------------|
| 19 |   |                         |     |                                                                                                                                                                                                                                                                                                                                                                                                              |
| 20 |   |                         |     |                                                                                                                                                                                                                                                                                                                                                                                                              |
| 21 |   |                         |     |                                                                                                                                                                                                                                                                                                                                                                                                              |
| 22 | ✓ | Data collection methods | 18a | Plans for assessment and collection of outcome, baseline, and other trial data, including any related processes to promote data quality (eg, duplicate measurements, training of assessors) and a description of study instruments (eg, questionnaires, laboratory tests) along with their reliability and validity, if known. Reference to where data collection forms can be found, if not in the protocol |
| 23 |   |                         |     |                                                                                                                                                                                                                                                                                                                                                                                                              |
| 24 |   |                         |     |                                                                                                                                                                                                                                                                                                                                                                                                              |
| 25 |   |                         |     |                                                                                                                                                                                                                                                                                                                                                                                                              |
| 26 |   |                         |     |                                                                                                                                                                                                                                                                                                                                                                                                              |
| 27 |   |                         |     |                                                                                                                                                                                                                                                                                                                                                                                                              |
| 28 |   |                         |     |                                                                                                                                                                                                                                                                                                                                                                                                              |
| 29 |   |                         |     |                                                                                                                                                                                                                                                                                                                                                                                                              |
| 30 | ✓ |                         | 18b | Plans to promote participant retention and complete follow-up, including list of any outcome data to be collected for participants who discontinue or deviate from intervention protocols                                                                                                                                                                                                                    |
| 31 |   |                         |     |                                                                                                                                                                                                                                                                                                                                                                                                              |
| 32 |   |                         |     |                                                                                                                                                                                                                                                                                                                                                                                                              |
| 33 |   |                         |     |                                                                                                                                                                                                                                                                                                                                                                                                              |
| 34 | ✓ | Data management         | 19  | Plans for data entry, coding, security, and storage, including any related processes to promote data quality (eg, double data entry; range checks for data values). Reference to where details of data management procedures can be found, if not in the protocol                                                                                                                                            |
| 35 |   |                         |     |                                                                                                                                                                                                                                                                                                                                                                                                              |
| 36 |   |                         |     |                                                                                                                                                                                                                                                                                                                                                                                                              |
| 37 |   |                         |     |                                                                                                                                                                                                                                                                                                                                                                                                              |
| 38 |   |                         |     |                                                                                                                                                                                                                                                                                                                                                                                                              |
| 39 |   |                         |     |                                                                                                                                                                                                                                                                                                                                                                                                              |
| 40 | ✓ | Statistical methods     | 20a | Statistical methods for analysing primary and secondary outcomes. Reference to where other details of the statistical analysis plan can be found, if not in the protocol                                                                                                                                                                                                                                     |
| 41 |   |                         |     |                                                                                                                                                                                                                                                                                                                                                                                                              |
| 42 |   |                         |     |                                                                                                                                                                                                                                                                                                                                                                                                              |
| 43 |   |                         |     |                                                                                                                                                                                                                                                                                                                                                                                                              |
| 44 |   |                         |     |                                                                                                                                                                                                                                                                                                                                                                                                              |
| 45 | ✓ |                         | 20b | Methods for any additional analyses (eg, subgroup and adjusted analyses)                                                                                                                                                                                                                                                                                                                                     |
| 46 |   |                         |     |                                                                                                                                                                                                                                                                                                                                                                                                              |
| 47 |   |                         |     |                                                                                                                                                                                                                                                                                                                                                                                                              |
| 48 | ✓ |                         | 20c | Definition of analysis population relating to protocol non-adherence (eg, as randomised analysis), and any statistical methods to handle missing data (eg, multiple imputation)                                                                                                                                                                                                                              |
| 49 |   |                         |     |                                                                                                                                                                                                                                                                                                                                                                                                              |
| 50 |   |                         |     |                                                                                                                                                                                                                                                                                                                                                                                                              |

### Methods: Monitoring

|    |   |                 |     |                                                                                                                                                                                                                                                                                                                                       |
|----|---|-----------------|-----|---------------------------------------------------------------------------------------------------------------------------------------------------------------------------------------------------------------------------------------------------------------------------------------------------------------------------------------|
| 51 |   |                 |     |                                                                                                                                                                                                                                                                                                                                       |
| 52 |   |                 |     |                                                                                                                                                                                                                                                                                                                                       |
| 53 |   |                 |     |                                                                                                                                                                                                                                                                                                                                       |
| 54 | ✓ | Data monitoring | 21a | Composition of data monitoring committee (DMC); summary of its role and reporting structure; statement of whether it is independent from the sponsor and competing interests; and reference to where further details about its charter can be found, if not in the protocol. Alternatively, an explanation of why a DMC is not needed |
| 55 |   |                 |     |                                                                                                                                                                                                                                                                                                                                       |
| 56 |   |                 |     |                                                                                                                                                                                                                                                                                                                                       |
| 57 |   |                 |     |                                                                                                                                                                                                                                                                                                                                       |
| 58 |   |                 |     |                                                                                                                                                                                                                                                                                                                                       |
| 59 |   |                 |     |                                                                                                                                                                                                                                                                                                                                       |
| 60 |   |                 |     |                                                                                                                                                                                                                                                                                                                                       |

|    |     |                                 |     |                                                                                                                                                                                                                                                                                     |
|----|-----|---------------------------------|-----|-------------------------------------------------------------------------------------------------------------------------------------------------------------------------------------------------------------------------------------------------------------------------------------|
| 1  |     |                                 |     |                                                                                                                                                                                                                                                                                     |
| 2  | ✓   |                                 | 21b | Description of any interim analyses and stopping guidelines, including who will have access to these interim results and make the final decision to terminate the trial                                                                                                             |
| 3  |     |                                 |     |                                                                                                                                                                                                                                                                                     |
| 4  |     |                                 |     |                                                                                                                                                                                                                                                                                     |
| 5  |     |                                 |     |                                                                                                                                                                                                                                                                                     |
| 6  | ✓   | Harms                           | 22  | Plans for collecting, assessing, reporting, and managing solicited and spontaneously reported adverse events and other unintended effects of trial interventions or trial conduct                                                                                                   |
| 7  |     |                                 |     |                                                                                                                                                                                                                                                                                     |
| 8  |     |                                 |     |                                                                                                                                                                                                                                                                                     |
| 9  |     |                                 |     |                                                                                                                                                                                                                                                                                     |
| 10 | ✓   | Auditing                        | 23  | Frequency and procedures for auditing trial conduct, if any, and whether the process will be independent from investigators and the sponsor                                                                                                                                         |
| 11 |     |                                 |     |                                                                                                                                                                                                                                                                                     |
| 12 |     |                                 |     |                                                                                                                                                                                                                                                                                     |
| 13 |     |                                 |     |                                                                                                                                                                                                                                                                                     |
| 14 |     |                                 |     |                                                                                                                                                                                                                                                                                     |
| 15 |     |                                 |     |                                                                                                                                                                                                                                                                                     |
| 16 |     | <b>Ethics and dissemination</b> |     |                                                                                                                                                                                                                                                                                     |
| 17 | ✓   | Research ethics approval        | 24  | Plans for seeking research ethics committee/institutional review board (REC/IRB) approval                                                                                                                                                                                           |
| 18 |     |                                 |     |                                                                                                                                                                                                                                                                                     |
| 19 |     |                                 |     |                                                                                                                                                                                                                                                                                     |
| 20 | ✓   | Protocol amendments             | 25  | Plans for communicating important protocol modifications (eg, changes to eligibility criteria, outcomes, analyses) to relevant parties (eg, investigators, REC/IRBs, trial participants, trial registries, journals, regulators)                                                    |
| 21 |     |                                 |     |                                                                                                                                                                                                                                                                                     |
| 22 |     |                                 |     |                                                                                                                                                                                                                                                                                     |
| 23 |     |                                 |     |                                                                                                                                                                                                                                                                                     |
| 24 |     |                                 |     |                                                                                                                                                                                                                                                                                     |
| 25 |     |                                 |     |                                                                                                                                                                                                                                                                                     |
| 26 | ✓   | Consent or assent               | 26a | Who will obtain informed consent or assent from potential trial participants or authorised surrogates, and how (see Item 32)                                                                                                                                                        |
| 27 |     |                                 |     |                                                                                                                                                                                                                                                                                     |
| 28 |     |                                 |     |                                                                                                                                                                                                                                                                                     |
| 29 |     |                                 |     |                                                                                                                                                                                                                                                                                     |
| 30 | N/A |                                 | 26b | Additional consent provisions for collection and use of participant data and biological specimens in ancillary studies, if applicable                                                                                                                                               |
| 31 |     |                                 |     |                                                                                                                                                                                                                                                                                     |
| 32 |     |                                 |     |                                                                                                                                                                                                                                                                                     |
| 33 | ✓   | Confidentiality                 | 27  | How personal information about potential and enrolled participants will be collected, shared, and maintained in order to protect confidentiality before, during, and after the trial                                                                                                |
| 34 |     |                                 |     |                                                                                                                                                                                                                                                                                     |
| 35 |     |                                 |     |                                                                                                                                                                                                                                                                                     |
| 36 |     |                                 |     |                                                                                                                                                                                                                                                                                     |
| 37 | ✓   | Declaration of interests        | 28  | Financial and other competing interests for principal investigators for the overall trial and each study site                                                                                                                                                                       |
| 38 |     |                                 |     |                                                                                                                                                                                                                                                                                     |
| 39 |     |                                 |     |                                                                                                                                                                                                                                                                                     |
| 40 | ✓   | Access to data                  | 29  | Statement of who will have access to the final trial dataset, and disclosure of contractual agreements that limit such access for investigators                                                                                                                                     |
| 41 |     |                                 |     |                                                                                                                                                                                                                                                                                     |
| 42 |     |                                 |     |                                                                                                                                                                                                                                                                                     |
| 43 |     |                                 |     |                                                                                                                                                                                                                                                                                     |
| 44 |     |                                 |     |                                                                                                                                                                                                                                                                                     |
| 45 | N/A | Ancillary and post-trial care   | 30  | Provisions, if any, for ancillary and post-trial care, and for compensation to those who suffer harm from trial participation                                                                                                                                                       |
| 46 |     |                                 |     |                                                                                                                                                                                                                                                                                     |
| 47 |     |                                 |     |                                                                                                                                                                                                                                                                                     |
| 48 | ✓   | Dissemination policy            | 31a | Plans for investigators and sponsor to communicate trial results to participants, healthcare professionals, the public, and other relevant groups (eg, via publication, reporting in results databases, or other data sharing arrangements), including any publication restrictions |
| 49 |     |                                 |     |                                                                                                                                                                                                                                                                                     |
| 50 |     |                                 |     |                                                                                                                                                                                                                                                                                     |
| 51 |     |                                 |     |                                                                                                                                                                                                                                                                                     |
| 52 |     |                                 |     |                                                                                                                                                                                                                                                                                     |
| 53 |     |                                 |     |                                                                                                                                                                                                                                                                                     |
| 54 | ✓   |                                 | 31b | Authorship eligibility guidelines and any intended use of professional writers                                                                                                                                                                                                      |
| 55 |     |                                 |     |                                                                                                                                                                                                                                                                                     |
| 56 |     |                                 |     |                                                                                                                                                                                                                                                                                     |
| 57 | ✓   |                                 | 31c | Plans, if any, for granting public access to the full protocol, participant-level dataset, and statistical code                                                                                                                                                                     |
| 58 |     |                                 |     |                                                                                                                                                                                                                                                                                     |
| 59 |     |                                 |     |                                                                                                                                                                                                                                                                                     |
| 60 |     |                                 |     |                                                                                                                                                                                                                                                                                     |



## Appendices

|   |     |                            |    |                                                                                                                                                                                                |
|---|-----|----------------------------|----|------------------------------------------------------------------------------------------------------------------------------------------------------------------------------------------------|
| 4 | N/A | Informed consent materials | 32 | Model consent form and other related documentation given to participants and authorised surrogates                                                                                             |
| 8 | N/A | Biological specimens       | 33 | Plans for collection, laboratory evaluation, and storage of biological specimens for genetic or molecular analysis in the current trial and for future use in ancillary studies, if applicable |

---

\*It is strongly recommended that this checklist be read in conjunction with the SPIRIT 2013 Explanation & Elaboration for important clarification on the items. Amendments to the protocol should be tracked and dated. The SPIRIT checklist is copyrighted by the SPIRIT Group under the Creative Commons "[Attribution-NonCommercial-NoDerivs 3.0 Unported](https://creativecommons.org/licenses/by-nc-nd/3.0/)" license.

For peer review only

# BMJ Open

## The effects of an e-health intervention ('iSupport') for reducing distress of dementia carers: protocol for a randomised controlled trial and feasibility study

|                                 |                                                                                                                                                                                                                                                                                                                                                                                                                                                                                                                                                                                                                                                                                                                                                                                                                                                                                                                                                                                            |
|---------------------------------|--------------------------------------------------------------------------------------------------------------------------------------------------------------------------------------------------------------------------------------------------------------------------------------------------------------------------------------------------------------------------------------------------------------------------------------------------------------------------------------------------------------------------------------------------------------------------------------------------------------------------------------------------------------------------------------------------------------------------------------------------------------------------------------------------------------------------------------------------------------------------------------------------------------------------------------------------------------------------------------------|
| Journal:                        | <i>BMJ Open</i>                                                                                                                                                                                                                                                                                                                                                                                                                                                                                                                                                                                                                                                                                                                                                                                                                                                                                                                                                                            |
| Manuscript ID                   | bmjopen-2022-064314.R1                                                                                                                                                                                                                                                                                                                                                                                                                                                                                                                                                                                                                                                                                                                                                                                                                                                                                                                                                                     |
| Article Type:                   | Protocol                                                                                                                                                                                                                                                                                                                                                                                                                                                                                                                                                                                                                                                                                                                                                                                                                                                                                                                                                                                   |
| Date Submitted by the Author:   | 28-Jul-2022                                                                                                                                                                                                                                                                                                                                                                                                                                                                                                                                                                                                                                                                                                                                                                                                                                                                                                                                                                                |
| Complete List of Authors:       | Windle, Gill; Bangor University<br>Flynn, Greg; Bangor University<br>Hoare, Zoe; Bangor University, North Wales Organisation for Randomised Trials in Health<br>Masterson-Algar, Patricia; Bangor University College of Health and Behavioural Sciences, School of Health Sciences<br>Egan, Kieren; University of Strathclyde, Department of Computer and Information Science<br>Edwards, Rhiannon; Bangor University, Centre for Health Economics & Medicines Evaluation<br>Jones, Carys; Bangor Univ<br>Spector, Aimee; University College London (UCL), Department of Clinical, Educational and Health Psychology<br>Algar-Skaife, Katherine; NTNU), Department of Neuro-medicine and Movement Science<br>Hughes, Gwenllian; Bangor University<br>Brocklehurst, P; Bangor University<br>Goulden, Nia; Bangor University, NWORD CTU<br>Skelhorn, Debbie; Bangor University<br>Stott, Joshua; University College London Research Department of Clinical Educational and Health Psychology |
| <b>Primary Subject Heading</b>: | Mental health                                                                                                                                                                                                                                                                                                                                                                                                                                                                                                                                                                                                                                                                                                                                                                                                                                                                                                                                                                              |
| Secondary Subject Heading:      | Mental health, Health informatics                                                                                                                                                                                                                                                                                                                                                                                                                                                                                                                                                                                                                                                                                                                                                                                                                                                                                                                                                          |
| Keywords:                       | Dementia < NEUROLOGY, Telemedicine < BIOTECHNOLOGY & BIOINFORMATICS, HEALTH ECONOMICS                                                                                                                                                                                                                                                                                                                                                                                                                                                                                                                                                                                                                                                                                                                                                                                                                                                                                                      |
|                                 |                                                                                                                                                                                                                                                                                                                                                                                                                                                                                                                                                                                                                                                                                                                                                                                                                                                                                                                                                                                            |

SCHOLARONE™  
Manuscripts

1  
2  
3 **The effects of an e-health intervention ‘iSupport’ for reducing distress of dementia**  
4  
5 **carers: protocol for a randomised controlled trial and feasibility study**  
6  
7  
8  
9

10 **Authors**

11 Gill Windle<sup>1</sup>, Greg Flynn<sup>1</sup>, Zoë Hoare<sup>1</sup>, Patricia Masterson-Algar<sup>1</sup>, Kieren Egan<sup>2</sup>, Rhiannon  
12 Tudor Edwards<sup>1</sup>, Carys Jones<sup>1</sup>, Aimee Spector<sup>3</sup>, Katherine Algar-Skaife<sup>4</sup>, Gwenllian  
13 Hughes<sup>1</sup>, Paul Brocklehurst<sup>1</sup>, Nia Goulden<sup>1</sup>, Debbie Skelhorn<sup>1</sup>, Joshua Stott<sup>3</sup>.  
14  
15  
16  
17  
18  
19  
20  
21  
22

23 <sup>1</sup> School of Medical and Health Sciences, Bangor University, Bangor, UK

24 <sup>2</sup> Department of Computer and Information Science, University of Strathclyde, UK

25 <sup>3</sup> Department of Clinical, Educational and Health Psychology, University College London  
26 (UCL), London, UK  
27  
28  
29

30 <sup>4</sup> Department of Neuro-medicine and Movement Science (INB), Norwegian University of  
31 Science and Technology (NTNU), Trondheim, Norway.  
32  
33  
34  
35  
36  
37  
38

39 Corresponding author: Professor Gill Windle, DSDC Wales Research Centre/Ageing and  
40 Dementia @ Bangor, School of Medical and Health Sciences, Bangor University, Fron  
41 Heulog, Bangor, Gwynedd, Wales. [g.windle@bangor.ac.uk](mailto:g.windle@bangor.ac.uk)  
42  
43  
44  
45  
46  
47

48 Word count for article summary and main text =3588 (excluding title page, abstract,  
49 references, figures and tables).  
50  
51  
52  
53  
54  
55  
56  
57  
58  
59  
60

## ABSTRACT

**Introduction:** In the United Kingdom, National Health Service (NHS) guidelines recommend that informal carers of people living with dementia should be offered training to help them develop care skills and manage their own physical and mental health. The World Health Organization (WHO) recommend access to affordable, proven, well-designed, online technologies for education, skills-training and support for dementia carers. In response to these recommendations, this multi-site randomised controlled trial (RCT) is the first study in the UK to evaluate the clinical and cost-effectiveness of an online support programme developed by the WHO called ‘iSupport for dementia carers.’

**Methods and analysis:** 350 informal carers (age 18+) living in Britain who self-identify as experiencing stress and depression will be recruited. They will be randomised to receive ‘iSupport’, or standardised information about caring for someone with dementia (control-comparison). Data will be collected via videoconferencing (e.g. Zoom) or telephone interview at baseline, three months and six months. Intention-to-treat analysis will ascertain effectiveness in the primary outcomes (distress and depression) and combined cost and quality adjusted life year (QALY) data will be used to assess cost-effectiveness compared with usual care from a public sector and wider societal perspective. A mixed-methods process evaluation with a sub-group of carers in the intervention (~N=50) will explore the barriers and facilitators to implementing ‘iSupport’. A non-randomised feasibility study will adapt ‘iSupport’ for young carers (N=38 participants, age 11-17).

1  
2  
3 **Ethics and dissemination:** The research plan was scrutinised by National Institute for Health  
4  
5 Research reviewers ahead of funding being awarded. Ethical approval was granted by Bangor  
6  
7 University's School of Health and Medical Sciences Academic Ethics Committee, reference  
8  
9 number 2021-16915. Dissemination plans include delivering events for stakeholders, social  
10  
11 media, a project website, developing policy briefings, presenting at conferences and  
12  
13 producing articles for open access publications.  
14  
15

16  
17  
18 **Registration details:** Trial registration number ISRCTN17420703.  
19  
20

21  
22 **Keywords:** dementia; carers; iSupport; technology; internet; website; randomized controlled  
23  
24 trial; protocol; process evaluation; cost effectiveness; young carers.  
25  
26  
27  
28  
29  
30  
31  
32  
33  
34  
35  
36  
37  
38  
39  
40  
41  
42  
43  
44  
45  
46  
47  
48  
49  
50  
51  
52  
53  
54  
55  
56  
57  
58  
59  
60

## ARTICLE SUMMARY

### Strengths and limitations of this study

- iSupport for dementia carers was developed by experts at the WHO and is based on techniques with proven therapeutic efficacy, consequently the content is informed by a considerable body of evidence.
- The ‘real world’ application of the randomized controlled trial requires carers to self-identify as experiencing some level of stress or depression, but some may have mild symptoms, limiting the potential for improving these primary outcomes.
- Although the research assistants will be ‘blind’ to the randomisation, a limitation of the study includes being unable to completely blind the participants to their respective allocation (iSupport or information about being a carer).
- Remote data collection and intervention delivery will potentially reach a broader and more diverse range of carers beyond the geographical boundaries often experienced through in-person data collection, however this could also create challenges for recruiting to target.
- The feasibility study will work with young people to generate valuable information leading to an adapted version of ‘iSupport’ for young carers.

## INTRODUCTION

‘Dementia’ is an umbrella term for a cluster of symptoms that characterise neurodegenerative changes, decline and loss of cognitive functioning. Dementia is one of the leading causes of care dependency, disability and death around the world.<sup>1</sup> The number of people living with dementia is predicted to increase globally, and it is estimated the number of people living with dementia in the UK will increase 80% by 2040.<sup>2</sup> The limited medical treatments available for people living with dementia mean that in the UK, most people living with dementia are cared for at home,<sup>3</sup> supported by a family member or friend who often performs care tasks similar to those carried out by paid health or social service providers. The detrimental impact of caregiving on the physical and mental health of informal carers is well-documented;<sup>4,5</sup> a meta-analysis found carers were more stressed, depressed, and had lower levels of subjective well-being, physical health, and self-efficacy than non-carers.<sup>6</sup>

Dementia carers have expressed a need for: a) relevant information and knowledge; b) support with the management of care recipients’ functioning, behavioural and psychological symptoms; c) support with their own physical and mental health; d) support regarding their unbalanced social life.<sup>7</sup> In the face of these significant challenges, Action Area 5 of the World Health Organization’s Global Action Plan on Dementia 2017-2025 prioritises supporting carers, calling for the provision of accessible evidence-based information to improve knowledge and skills, and prevent stress and health problems.<sup>8</sup>

To address these challenges the World Health Organization (WHO) developed ‘iSupport’, an evidence-informed e-health intervention designed to help dementia carers provide good care and take care of themselves. The content reflects evidence that the most effective interventions for carers’ psychological health should incorporate both an educational

1  
2  
3 component to enhance knowledge, and a therapeutic component, such as Cognitive  
4 Behavioural Therapy /cognitive reframing.<sup>9</sup> Such interventions are often delivered in-person,  
5  
6 however the ongoing Covid-19 pandemic led to reductions, delays and withdrawal of many  
7  
8 support services for carers.<sup>10</sup> Online interventions could be one solution to providing  
9  
10 support, negating general accessibility barriers such as carers' time constraints or needing to  
11  
12 travel to receive care and support,<sup>11</sup> due to their convenience of use, low delivery costs, and  
13  
14 the ability to negate geographical barriers.<sup>12</sup> The potential for scalability is also relevant, as  
15  
16 few e-health interventions for carers are implemented outside a research setting.<sup>13,14,15</sup>  
17  
18 However, despite their potential, the evidence base remains limited and high-quality studies  
19  
20 are required to enable definitive conclusions about their effectiveness.<sup>16</sup> In response, this  
21  
22 study aims to contribute to this growing area of healthcare delivery.  
23  
24  
25  
26  
27  
28  
29  
30

31 'iSupport' is in the process of global implementation and there is research underway in The  
32  
33 Netherlands, India and Portugal,<sup>17,18,19</sup> but to date, there is no published evidence as to the  
34  
35 effectiveness of 'iSupport'. This will be the first study to examine the effectiveness and cost  
36  
37 effectiveness of a globally targeted e-health intervention in a majority English-speaking  
38  
39 population of dementia carers. It will also evaluate the feasibility of adapting 'iSupport' for  
40  
41 young carers (ages 11-17). It is vital that current and future carers have access to education  
42  
43 programmes that are tailored to address their particular needs,<sup>20</sup> as current generic dementia  
44  
45 support services are not able to address the specific challenges young carers face.  
46  
47  
48  
49  
50

## 51 **Research questions**

52  
53 1. Are carer distress and depression (primary outcomes) significantly reduced in participants  
54  
55 allocated to receive 'iSupport' compared to participants allocated to a control-comparison  
56  
57 group receiving standardised information about caring for someone with dementia?  
58  
59  
60



2. Are symptoms of anxiety (secondary outcome) significantly reduced and resilience, relationship quality and dementia knowledge (secondary outcomes) significantly increased in participants allocated to receive 'iSupport' compared to participants allocated to the control-comparison group?
3. What are participant and contextual barriers and facilitators to implementation of 'iSupport'?
4. What potential mechanisms might underpin changes in outcomes from using 'iSupport'?
5. What is the cost-effectiveness of 'iSupport' compared to standardised information about dementia?
6. Is it feasible and acceptable to digitally deliver a refined 'iSupport' to young carers?
7. What are the carers' perspectives of 'iSupport' in relation to supporting them in an ongoing or future repeated pandemic such as COVID-19?

## METHODS AND ANALYSIS

### Study design

'iSupport' for dementia carers is a multi-centre randomised controlled trial (RCT) and feasibility study composed of four workstreams (WS). WS1 will evaluate the effectiveness of 'iSupport' (compared to a control-comparison) in reducing carer distress and symptoms of depression (multiple primary outcomes), reductions in anxiety, improvements in resilience, relationship quality, and dementia knowledge (secondary outcomes). WS2 (process evaluation) will examine how participants engaged with 'iSupport', whether there are any barriers to its uptake, and any perceived benefits for the carer. WS3 (health economic evaluation) will calculate the cost-effectiveness of 'iSupport' from a public sector perspective<sup>21</sup> and from a wider societal perspective. WS4 (feasibility study) will adapt 'iSupport' for young carers, and assesses the feasibility, acceptability and uptake of conducting a larger trial. Supplementary File 1 contains the objectives for each workstream. This protocol was developed according to the SPIRIT (2013) checklist<sup>22</sup>. The study runs for

36 months (1<sup>st</sup> January 2021 to 31<sup>st</sup> December 2023). At the end of their involvement in the study, all participants will receive information about regional support services and a £20 voucher.

### **RCT participant recruitment**

Carers living in England, Scotland and Wales will be recruited between December 2021 and January 2023 by researchers working from Bangor University (co-ordinating centre), University College London, or University of Strathclyde (collaborating sites). Researchers will advertise the study through social media; our study partners (Alzheimer Scotland and Carers Trust Wales) and other non-statutory organisations will advertise the study to regional groups through their networks; and the Join Dementia Research (JDR)<sup>23</sup> register will be used to identify potential participants (Supplementary File 2 ). All carers who express an interest in taking part will be sent a consent form, information sheet and be invited to discuss their involvement with a researcher in a one-to-one videoconferencing or phone meeting, when the researcher would also assess their eligibility (Table 1).

Table 1: Eligibility criteria for the RCT.

|                    |                                                                                                                                                                                                                                                                                                                                                                                           |
|--------------------|-------------------------------------------------------------------------------------------------------------------------------------------------------------------------------------------------------------------------------------------------------------------------------------------------------------------------------------------------------------------------------------------|
| Inclusion criteria | <p>1) Adults (age 18+) who self-identify as an unpaid carer of a person with dementia who is not living in a full-time care facility, caring at least weekly for at least 6 months.</p> <p>2) Self-identify as experiencing at least some stress, depression or anxiety.</p> <p>3) The care recipient has to have a confirmed diagnosis of dementia through self-report of the carer.</p> |
| Exclusion criteria | <p>1) Receiving psychological treatment from a mental health specialist at the time of recruitment.</p>                                                                                                                                                                                                                                                                                   |

- 2) Unable to comprehend written English.
  - 3) No access to the internet.
  - 4) Unable to give informed consent to the trial.
  - 5) Have previously used 'iSupport' materials in the last 12 months.
- 

A nested internal pilot study at each site will monitor progression criteria over the first six months of recruitment. Go/review/stop criterion will be assessed by the study's independent data monitoring committee (IDMC), and decisions about the study conduct will be made in consultation with the trial steering committee (TSC) and the Trial Management Group (TMG).

### **RCT sample size and randomisation**

A meta-analysis reported that technology-based interventions for informal carers of people living with dementia are effective in reducing both depression and burden outcomes.<sup>24</sup> Consequently both are important outcomes for carers, and the sample size considers these as multiple primary endpoints at six months. The multiple primary endpoint estimator in the R package<sup>25,26</sup> with power of 90% and significance set to 2.5%, established that 262 participants are required at six months to have the potential to detect an effect in at least one of these outcomes. The attrition rate was based on 9 dementia intervention studies, where the mean retention rate was 15.33% (range 2%-24%). Accommodating a 25% attrition rate by six months, the RCT will recruit and randomise 350 participants. Randomisation uses dynamic allocation to protect against subversion.<sup>27</sup> This ensures the trial maintains good balance to the allocation ratio of 1:1, both within each stratification variable and overall for the trial. Stratification variables will be site, along with age and gender, previously found to influence the outcome measure of caregiver distress.<sup>28</sup>

### RCT 'iSupport' intervention

iSupport is an internet-based psychoeducation and skills development intervention that can be accessed through a personal computer, tablet or mobile phone. The theoretical underpinnings of 'iSupport' are based on person-centred care, recognising that dementia care should reflect the individual's needs, personality and abilities<sup>29</sup> and are integrated into the interactive content of 'iSupport'. The self-care techniques are based on theoretically informed programmes with some evidence for benefits, including psychoeducation, relaxation, behavioural activation, cognitive reframing, and problem-solving.<sup>30</sup> Participants will access iSupport in their own homes or a place where they are able to access the internet.

'iSupport' consists of five main themes and twenty-three accompanying exercises (Figure 1).

Each exercise takes approximately 5-15 minutes and follows the same format: information about a topic presented; short interactive exercises and questions with instant feedback on responses; a summary of the lesson; a relaxation exercise. 'iSupport' is based on personal choice: carers can construct their own personalised plan and access which sessions they feel are most relevant to them at that point in time. Participants will be advised to use 'iSupport' regularly in order to obtain the most benefit. They will be provided with the contact details of an 'e-coach' (member of the research team), who will explain anything that is not clear about the 'iSupport' programme. The 'e-coach' will contact participants allocated to intervention shortly after randomisation, 1 month later and 2 months later (if required by the participant).

'iSupport' will be translated into Welsh following WHO adaptation guidelines.

Approximately one-fifth of the Welsh population speak Welsh<sup>31</sup> and the Welsh Government is committed to offering bilingual services as part of health care provision. To improve access, an audio/read aloud function is included in the iSupport programme.

(Figure 1)

### **RCT control-comparison to iSupport**

The control-comparison group will receive an information booklet (online and/or hard copy) about caring for someone with dementia, developed by the Alzheimer's Society.<sup>32</sup> Alongside this education, carers will receive care-as-usual. They can search for other information or seek help from other providers. Participants allocated to the control-comparison group will be provided with access to 'iSupport' at the end of data collection.

### **RCT data collection**

Case report forms (CRFs) were initially piloted by researchers, and adjustments made to reduce the time-burden to participants without affecting the study's ability to address the research questions. Data will be collected at three time-points: Baseline (T0), 3-months post-baseline (T1 follow-up), and 6-months post-baseline (T2 follow-up). Researchers will interview participants by videoconferencing or phone. Following the baseline interview, researchers will perform the randomisation and the CI or trial manager will email the participant their group allocation details. Follow-up interviews will be administered by researchers who are blinded to group allocation. An acceptable tolerance for follow-ups will be up to 2 weeks earlier and up to 4 weeks later than the exact T1 or T2 date. Figure 2 shows the flow of the participants through the study.

(Figure 2)

All data will be entered into an electronic database (MACRO),<sup>33</sup> and the study statistician will periodically monitor data quality. Table 2 shows the outcome measures, order of administration and the relevance for each workstream.

Table 2: Data collection for iSupport RCT

| Questionnaire or study-specific questions                                             | Time point | Workstream |
|---------------------------------------------------------------------------------------|------------|------------|
| Local COVID-19 alert level at date of assessment                                      | T0, T1, T2 | 1,2,3      |
| Demographic questions                                                                 | T0         | 1,2,3      |
| Employment, marital status, and living situation questions                            | T0, T1, T2 | 1,2,3      |
| 12-item Zarit Burden Interview (ZBI-12)* <sup>i</sup>                                 | T0, T1, T2 | 1,3        |
| 10-item Centre for Epidemiological Studies Depression Scale (CES-D-10)* <sup>ii</sup> | T0, T1, T2 | 1,3        |
| EQ-5D-5L <sup>iii</sup>                                                               | T0, T1, T2 | 3          |
| Resilience Scale-14 (RS-14) <sup>iv</sup>                                             | T0, T1, T2 | 1          |
| Generalised Anxiety Disorder Questionnaire (GAD-7) <sup>v</sup>                       | T0, T1, T2 | 1          |
| Dementia Knowledge Assessment Scale (DKAS) <sup>vi</sup>                              | T0, T1, T2 | 1          |
| Adapted Erasmus iMTA informal care questionnaire <sup>vii</sup>                       | T0, T1, T2 | 3          |
| Service use questions                                                                 | T0, T1, T2 | 3          |
| Quality of the Carer-Patient Relationship (QCPR) <sup>viii</sup>                      | T0, T1, T2 | 1          |
| Dementia Quality of Life - Proxy measure (DEMQOL-Proxy) <sup>ix</sup>                 | T0, T1, T2 | 1,3        |
| Researcher remains blinded to allocation question                                     | T1, T2     | 1          |

\*indicates primary outcome measure for WS1

## WS2 Process evaluation sampling and data collection

The process evaluation utilises three different approaches to data collection:

1. Semi-structured interviews will be undertaken with up to 50 of carers in the intervention group following their T2 interview. The choice of sample size in qualitative research is an area of debate,<sup>34</sup> however our decision was informed by Ritchie and colleagues<sup>35</sup> who recommend that studies employing individual interviews should undertake no more than 50

1  
2  
3 interviews in order to manage the complexity of the analysis. Baseline data will inform a  
4  
5 purposive sampling strategy and a qualitative sampling matrix will be developed. This matrix  
6  
7 will include a diverse range of participant demographic characteristics such as age, gender  
8  
9 and caring responsibilities and differences in scores across the the ZBI-12 and the CES-D-10  
10  
11 scores (low, medium, high).  
12  
13  
14  
15  
16

17 The interview topics will be guided by the process evaluation parameters described in  
18  
19 recognised frameworks,<sup>36,37</sup> and drawing upon theoretical models such as Normalisation  
20  
21 Process Theory (NPT).<sup>38</sup> Motives for declining participation will also be noted where consent  
22  
23 is given, to understand any barriers to participation and potential selection bias.  
24  
25  
26  
27  
28

29 2. Data from the online platform will be collected regarding usability (e.g. frequency and  
30  
31 length of use, which modules/sessions/pages users most frequently visit, average time spend  
32  
33 on each module/session/page, whether accessed from tablet, PC or mobile phone). The  
34  
35 number of contacts with the e-coach will be recorded.  
36  
37  
38  
39

40 3. An online evaluation questionnaire will collect quantitative data from all study participants  
41  
42 in the intervention arm and will be administered at 6-month follow-up (T2).<sup>39</sup> This  
43  
44 questionnaire will evaluate the overall usability and acceptability of the 'iSupport' platform  
45  
46 in conjunction with all other data collection methods.  
47  
48  
49  
50

#### 51 **WS4 Feasibility study: participant recruitment**

52  
53 Young carers and professionals who have regular contact with young carers will be recruited  
54  
55 through stakeholders' networks, social media, and national carers associations (Table 3).  
56  
57

58 Researchers will approach parents or legal guardians of participants under the age of 16 to  
59  
60

explain their child's involvement and obtain their consent from them. Supplementary File 3 visualises the phases of the feasibility study.

Table 3: Feasibility study eligibility criteria

| Inclusion | Young carers                                                                                                                                                                                                                                                                                                           | Professionals                                                                                                                                                                         |
|-----------|------------------------------------------------------------------------------------------------------------------------------------------------------------------------------------------------------------------------------------------------------------------------------------------------------------------------|---------------------------------------------------------------------------------------------------------------------------------------------------------------------------------------|
| criteria  | <p>1) Young people between the ages of 11 - 17 who self-identify as a carer of a person with dementia who is not living in a full-time care facility, caring at least weekly for at least 6 months.</p> <p>2) The care recipient has to have a confirmed diagnosis of dementia (through self-report of the carer).</p> | <p>1) Have regular contact with young people and young carers (e.g. teaching staff involved in pastoral care, young carer charity workers, social workers in children's services.</p> |
| Exclusion | <p>1) Receiving treatment from Child and Adolescent Mental Health Services (CAMHS) at the time of recruitment.</p> <p>2) Unable to comprehend written English.</p> <p>3) No access to the internet.</p> <p>4) Have previously used 'iSupport' materials in the last 12 months.</p>                                     | <p>1) No regular contact with young people and young carers as part of their work.</p> <p>2) Unable to comprehend written English.</p> <p>3) No access to the internet.</p>           |



## **WS4: data collection**

### ***Phase 1: Adapting 'iSupport' for young carers***

Three x 3-hour workshops will be conducted either in person or using videoconferencing software (e.g. Zoom, Teams or Skype) depending on the government guidelines regarding COVID-19 and safety. At least two weeks before the workshops, participants will be given online access to 'iSupport' and printed materials for annotations. Workshop One will recruit 6-8 young carers to discuss their care-giving experiences, which aspects are reflected or missing in 'iSupport', and opinions on the content and style of the intervention. Workshop Two will undertake a similar exercise with 6-8 professionals who work with young carers. Feedback will be used to refine 'iSupport', which will be shared in Workshop Three with all participants who attended the first two workshops in order to produce a "final" version. Discussions around which outcomes are most important for young carers in relation to 'iSupport' will be used to adapt the CRF from the RCT for Phase 2.

### ***Phase 2: Feasibility testing 'iSupport' for younger dementia carers***

Young carers will test the feasibility of using the refined 'iSupport' and following the RCT procedures (except randomisation will not be required). After T2 data collection, participants will complete an online evaluation of their experience using 'iSupport'. Informed by a methodological framework,<sup>40</sup> a sample of n=30 for phase 2 will provide enough information on the acceptability of the intervention, the appropriateness of data collection forms, the feasibility of recruitment and consent procedures, and the most appropriate primary outcome measures.

## Data analysis plans

### *WS1 (research questions 1 and 2).*

WS1 Primary analysis is an intention-to-treat (ITT) analysis, blinded to treatment allocation.

The primary assessment for effectiveness will be adjusted estimates of the ZBI-12 and CES-D-10 scores between the two groups assessed at 6 months. A linear mixed-effects model adjusting for baseline scores, randomising site (random effect), and stratification variables will be fitted for each of the two primary outcomes. Similar models will be fitted for all continuous secondary outcomes. All estimates of effect will be presented together with 95% confidence intervals. The aim is to minimise missing data; however, predictors of missingness will be investigated using regression models and any predictors found will be considered for inclusion in the models. Multiple imputation will address missing scores where appropriate. Complier Average Causal Effect (CACE) analysis will assess the impact of the number of times the 'iSupport' intervention was accessed. A sensitivity analysis will assess any impact of the outcome measures being completed in Welsh. A full statistical analysis plan will be written and agreed with the independent committees before completion of the data collection.

### *WS2 Process evaluation (research questions 3, 4 and 7).*

Qualitative interview data analysis will be professionally transcribed verbatim and thematically analysed<sup>41</sup> using NVivo. Results will also be applied to aspects of the Context and Implementation of Complex Interventions (CICI) checklist<sup>42</sup>, which may reflect implementation in a 'real world' setting. This analysis will reveal the experiences of using iSupport and its delivery, the barriers and facilitators to its uptake and continued use, and the perceived benefits for the carer participating in iSupport and the person they are caring for. Descriptive analyses will profile the System Usability Scale and intervention platform

1  
2  
3 metrics regarding usability (e.g. most/least frequently visited pages, the most ‘popular’  
4  
5 modules/sessions).  
6  
7  
8  
9

### 10 ***WS3 Health economic evaluation (research question 5).***

11  
12 Primary analysis will be an ITT analysis as per WS1. Cost and quality-adjusted life years data  
13  
14 will be combined to calculate an incremental cost-effectiveness ratio. Cost-effectiveness  
15  
16 acceptability curves<sup>43</sup> will show the probability that ‘iSupport’ is cost-effective compared to  
17  
18 the control-comparison for a range of willingness-to-pay thresholds. Secondary cost-  
19  
20 effectiveness analyses will calculate the cost per unit change in the primary outcome  
21  
22 measures. A sub-group analysis will be conducted on the number of times that carers in the  
23  
24 intervention group accessed ‘iSupport’. Deterministic sensitivity analyses will be conducted  
25  
26 to vary the costs of inputs.  
27  
28  
29  
30  
31  
32

### 33 ***WS4 feasibility study (research question 6).***

34  
35 Data from Phase 1 workshops will be selectively transcribed, analysed and reported  
36  
37 according to established guidance<sup>44</sup>. All quantitative data collected during Phase 2 will be  
38  
39 presented descriptively. No inferential testing will be undertaken for this data. The mean  
40  
41 change from baseline, associated variances, and 95% confidence intervals will be calculated  
42  
43 for all selected outcomes. Consideration will be given to the applicability of these outcomes  
44  
45 for development into a protocol for a future RCT if the acceptability of the intervention is  
46  
47 proven. Success will be defined as acceptability of the recruitment and consent procedure,  
48  
49 data collection tools, intervention content and delivery to participants, as well as compliance.  
50  
51  
52  
53

### 54 **Patient and public involvement**

55  
56  
57 We involved people living with dementia and their carers in the development of this research.  
58  
59 This was achieved by collaborating with the ‘Caban group of dementia educators’,  
60

1  
2  
3 established and supported by the lead applicant's research centre. The group raised a number  
4 of points for the team to consider, with 'fear of using the internet' being one area of concern.  
5  
6 The group felt a person should be available to help people with iSupport. In response we built  
7  
8 in provision for an 'e-coach' to support participants randomised to receive iSupport. Co-  
9  
10 applicant Hughes is a young adult carer for her father living with Vascular Dementia and felt  
11  
12 the needs of young carers are often overlooked and neglected. She has contributed to the  
13  
14 development of this research, especially the conceptualisation of the study design and  
15  
16 suggestions for the delivery of WS4, and is assisting with this phase. We will meet with the  
17  
18 CABAN group on a regular basis over the study duration, and at a previous meeting we  
19  
20 discussed how a visual participant information sheet could aid recruitment in line with  
21  
22 dementia research standards,<sup>45</sup> and that using videoconferencing software would be  
23  
24 preferable to phone calls for arranging and conducting remote interviews. Feedback from  
25  
26 this meeting was further referred to when drafting other study materials for consistency.  
27  
28  
29  
30  
31  
32  
33  
34

### 35 **ETHICS AND DISSEMINATION**

36  
37 iSupport was granted ethical approval by Bangor University's School of Medical and Health  
38  
39 Sciences Academic Ethics Committee (AEC), reference number 2021-16915. All researchers  
40  
41 are fully trained in the study procedures and receive regular supervision. A data management  
42  
43 and monitoring plan ensure adherence to the principles of Good Clinical Practice and relevant  
44  
45 regulations over the course of the study, and to effectively audit the day-to-day conduct at  
46  
47 each site. Carers will be provided with clear information and given time to ask questions and  
48  
49 consider whether to participate before providing consent (Supplementary File 4). Through the  
50  
51 content of our information sheets and consent forms, as well as contact with the research  
52  
53 team, participants will understand that they can refuse to participate or withdraw at any time.  
54  
55  
56  
57  
58  
59  
60

1  
2  
3 Changes to the study protocol will be agreed by the funder and an ethics amendment  
4 submitted to the AEC.  
5  
6  
7  
8  
9

10 Our research products will include peer-reviewed academic papers, Plain English/Cymraeg  
11 Clir summaries of findings, articles for practitioner magazines and a project website. All  
12 academic outputs will conform to the reporting procedures in the relevant methodology  
13 guidelines (e.g. CONSORT e-health<sup>46</sup>). Economic evaluation findings will be reported  
14 according to the recently updated CHEERS checklist, highlighting the role of PPIE relating to  
15 health economics.<sup>47</sup> We will present at conferences, conduct public and stakeholder events,  
16 and produce policy briefings.  
17  
18  
19  
20  
21  
22  
23  
24  
25  
26  
27

28 Our research activities will generate new versions of the iSupport platform for Welsh-  
29 language speakers, young carers, and a UK-focused version with audio function. If our  
30 research shows iSupport is effective, health and care providers, pastoral care teams in  
31 schools, and charitable organisations will be able to recommend an evidence-based online  
32 support service to dementia carers that will be publicly available for use at no cost. We hope  
33 this will improve policy and practice around delivering support to dementia carers. For  
34 example UK health and social care could recommend the adapted versions of iSupport in  
35 their dementia guidelines. This could reduce demand on community teams at post/diagnosis  
36 and initial stages of dementia.  
37  
38  
39  
40  
41  
42  
43  
44  
45  
46  
47  
48  
49  
50

51 Forthcoming in 2022 in a related project, we will be working in partnership with community  
52 organisations to translate and adapt iSupport into three South-Asian languages (Urdu, Punjabi  
53 and Bengali) to ensure minority ethnic groups in the UK can also access the support in a way  
54 that is culturally appropriate for them.  
55  
56  
57  
58  
59  
60

## CONTRIBUTORS

GW leads the project and is responsible for study integrity. GW, JS, ZH, KE, PM-A, KAS, RTE, CJ, PB and GH critically reviewed the study proposal and secured the research funding. JS, AS and KE lead collaboration sites. PM-A leads workstreams 2 and 4. RTE leads workstream 3. GF manages the study and led the ethics submission. NG is the trial statistician. DS advised on quality assurance. GW, JS, ZH, KE, PM-A, KAS, RTE, CJ, PB, GH, NG and DS contributed to the research protocol, provided edits and critiqued the manuscript for intellectual content.

## ACKNOWLEDGMENTS

The authors are extremely grateful to Professor Anne Magriet Pot, Erasmus School of Policy and Health Management, Erasmus University, the Netherlands for her inspiration and encouragement to seek funding for this project, the Caban Group for their thoughtful and useful insights, and the research assistants (Danielle Proctor, Gwenllian Hughes, John Connaghan, Fatene Abakar Ismail) for piloting the case report forms and to Stéfanie Freel and Katrin Seeher of the World Health Organisation for their comments on the funding application and ongoing support for the project delivery.

## FUNDING

This project is funded by the National Institute for Health Research (NIHR) Public Health Research programme (project reference NIHR130914). The views expressed are those of the authors and not necessarily those of the NIHR or the Department of Health and Social Care.

## DATA AVAILABILITY STATEMENT

The datasets generated during and/or analysed during the study will be available upon request via the corresponding author.

### COMPETING INTERESTS

The authors declare they have no competing interests.

### REFERENCES

- <sup>1</sup> World Health Organization. Global status report on the public health response to dementia [Internet]. Geneva: World Health Organization; 2021 Sep [cited 2022 Jan 28].  
<https://www.who.int/publications/i/item/9789240033245>
- <sup>2</sup> Wittenberg R, Hu B, Barraza-Araiza L, et al. Projections of older people with dementia and costs of dementia care in the United Kingdom, 2019–2040: Working paper [Internet]. London: Care Policy and Evaluation Centre; 2019 Nov [cited 2022 Jan 28].  
[https://www.alzheimers.org.uk/sites/default/files/2019-11/cpec\\_report\\_november\\_2019.pdf](https://www.alzheimers.org.uk/sites/default/files/2019-11/cpec_report_november_2019.pdf)
- <sup>3</sup> Lewis F, Karlsberg S, Sussex J, et al. Trajectory of dementia in the UK – making a difference: consulting report [Internet]. London: Office of Health Economics; 2014 Jun [cited 2022 Jan 28]. <https://www.alzheimersresearchuk.org/wp-content/uploads/2015/01/OHE-report-Full.pdf>
- <sup>4</sup> Gilhooly KJ, Gilhooly ML, Sullivan MP, et al. A meta-review of stress, coping and interventions in dementia and dementia caregiving. *BMC Geriatr*. 2016 May 18;16:106. doi: 10.1186/s12877-016-0280-8
- <sup>5</sup> Bremer P, Cabrera E, Leino-Kilpi H, et al. Informal dementia care: Consequences for caregivers' health and health care use in 8 European countries. *Health Policy*. 2015 Nov;119(11):1459-71. doi: 10.1016/j.healthpol.2015.09.014 [published Online First: 22 October 2022].
- <sup>6</sup> Pinquart M, Sörensen S. Differences between caregivers and noncaregivers in psychological health and physical health: a meta-analysis. *Psychol Aging*. 2003 Jun;18(2):250-67. doi: 10.1037/0882-7974.18.2.250

1  
2  
3 <sup>7</sup> McCabe M, You E, Tatangelo G. Hearing Their Voice: A Systematic Review of Dementia  
4 Family Caregivers' Needs. *Gerontologist*. 2016 Oct;56(5):e70-88. doi:  
5  
6 10.1093/geront/gnw078 [published Online First: 21 April 2016].  
7  
8

9  
10 <sup>8</sup> World Health Organization. Global action plan on the public health response to dementia  
11 2017–2025 [Internet]. Geneva: World Health Organization; 2017 [cited 2022 Jan 28].  
12  
13 [https://apps.who.int/iris/bitstream/handle/10665/259615/9789241513487-](https://apps.who.int/iris/bitstream/handle/10665/259615/9789241513487-eng.pdf?sequence=1)  
14  
15 [eng.pdf?sequence=1](https://apps.who.int/iris/bitstream/handle/10665/259615/9789241513487-eng.pdf?sequence=1)  
16  
17

18  
19 <sup>9</sup> Dickinson C, Dow J, Gibson G, et al. Psychosocial intervention for carers of people with  
20 dementia: What components are most effective and when? A systematic review of systematic  
21 reviews. *Int Psychogeriatr*. 2017 Jan;29(1):31-43. doi: 10.1017/S1041610216001447  
22  
23 [published Online First: 26 September 2016].  
24  
25

26  
27 <sup>10</sup> Masterson-Algar P, Allen MC, Hyde M, et al. Exploring the impact of Covid-19 on the  
28 care and quality of life of people with dementia and their carers: A scoping review.  
29  
30 *Dementia*. Published Online First: 1 November 2021.  
31  
32 <https://doi.org/10.1177/14713012211053971>  
33  
34

35  
36 <sup>11</sup> Egan KJ, Pinto-Bruno AC, Bighelli I, et al. Online Training and Support Programs  
37 Designed to Improve Mental Health and Reduce Burden Among Caregivers of People With  
38 Dementia: A Systematic Review. *J Am Med Dir Assoc*. 2018 Mar;19(3):200-206.e1. doi:  
39  
40 10.1016/j.jamda.2017.10.023 [published Online First: 4 January 2018].  
41  
42

43  
44 <sup>12</sup> Godwin KM, Mills WL, Anderson JA, et al. Technology-driven interventions for  
45 caregivers of persons with dementia: a systematic review. *Am J Alzheimers Dis Other*  
46  
47 *Demen*. 2013 May;28(3):216-22. doi: 10.1177/1533317513481091 [published Online First:  
48  
49 25 March 2013].  
50  
51  
52  
53  
54  
55  
56  
57  
58  
59  
60



- 1  
2  
3 13 Gitlin LN, Marx K, Stanley IH, et al. Translating Evidence-Based Dementia Caregiving  
4 Interventions into Practice: State-of-the-Science and Next Steps. *Gerontologist*. 2015  
5 Apr;55(2):210-26. doi: 10.1093/geront/gnu123 [published Online First: 17 February 2015].  
6  
7  
8  
9  
10  
11 14 Peterson K, Hahn H, Lee AJ, et al. In the Information Age, do dementia caregivers get the  
12 information they need? Semi-structured interviews to determine informal caregivers'  
13 education needs, barriers, and preferences. *BMC Geriatr*. 2016 Sep;16(164).  
14  
15  
16  
17 doi:10.1186/s12877-016-0338-7  
18  
19  
20  
21 15 Christie HL, Martin JL, Connor J, et al. eHealth interventions to support caregivers of  
22 people with dementia may be proven effective, but are they implementation-ready? *Internet*  
23 *Interv*. 2019 Jul;18:100260. doi: 10.1016/j.invent.2019.100260  
24  
25  
26  
27  
28 16 Hopwood J, Walker N, McDonagh L, et al. Internet-Based Interventions Aimed at  
29 Supporting Family Caregivers of People With Dementia: Systematic Review. *J Med Internet*  
30 *Res*. 2018 Jun;20(6):e216. doi: 10.2196/jmir.9548  
31  
32  
33  
34  
35  
36 17 Pinto-Bruno AC, Pot AM, Kleiboer A, et al. An Online Minimally Guided Intervention to  
37 Support Family and Other Unpaid Carers of People With Dementia: Protocol for a  
38 Randomized Controlled Trial. *JMIR Res Protoc*. 2019 Oct;8(10):e14106. doi: 10.2196/14106  
39  
40  
41  
42  
43 18 Mehta KM, Gallagher-Thompson D, Varghese M, et al. iSupport, an online training and  
44 support program for caregivers of people with dementia: study protocol for a randomized  
45 controlled trial in India. *Trials*. 2018 May;19(1):271. doi: 10.1186/s13063-018-2604-9  
46  
47  
48  
49  
50  
51 19 Teles S, Ferreira A, Seeher K, et al. Online training and support program (iSupport) for  
52 informal dementia caregivers: protocol for an intervention study in Portugal. *BMC Geriatr*.  
53  
54  
55  
56 2020 Jan;20(1):10. doi: 10.1186/s12877-019-1364-z  
57  
58  
59  
60

1  
2  
3 20 Baker JR, Jeon YH, Goodenough B, et al. What do children need to know about dementia?

4  
5 The perspectives of children and people with personal experience of dementia. *Int*

6  
7 *Psychogeriatr*. 2018 May;30(5):673-684. doi: 10.1017/S1041610217002022 [published

8  
9 Online First: 2 October 2017].

10  
11  
12  
13 21 National Institute for Health and Care Excellence (NICE). Methods for the development of

14  
15 NICE public health guidance [Internet]. 3rd ed. UK: NICE; c2006 [updated 2012 Sep; cited

16  
17 2022 Jan 28]. [https://www.nice.org.uk/process/pmg4/resources/methods-for-the-](https://www.nice.org.uk/process/pmg4/resources/methods-for-the-development-of-nice-public-health-guidance-third-edition-pdf-2007967445701)

18  
19 [development-of-nice-public-health-guidance-third-edition-pdf-2007967445701](https://www.nice.org.uk/process/pmg4/resources/methods-for-the-development-of-nice-public-health-guidance-third-edition-pdf-2007967445701)

20  
21  
22  
23 22 Chan AW, Tetzlaff JM, Altman DG, et al. SPIRIT 2013 statement: defining standard

24  
25 protocol items for clinical trials. *Ann Intern Med*. 2013 Feb;158(3):200-7. doi: 10.7326/0003-

26  
27 4819-158-3-201302050-00583

28  
29  
30 23 Join Dementia Research is funded by the Department of Health and delivered by the

31  
32 National Institute for Health Research in partnership with Alzheimer Scotland, Alzheimer's

33  
34 Research UK and Alzheimer's Society. [www.joindementiaresearch.nihr.ac.uk](http://www.joindementiaresearch.nihr.ac.uk) [accessed

35  
36 10/03/2021].

37  
38  
39  
40 24 Deeken F, Rezo A, Hinz M, et al. Evaluation of Technology-Based Interventions for

41  
42 Informal Caregivers of Patients With Dementia-A Meta-Analysis of Randomized Controlled

43  
44 Trials. *Am J Geriatr Psychiatry*. 2019 Apr;27(4):426-445. doi: 10.1016/j.jagp.2018.12.003.

45  
46 Epub 2018 Dec 6. PMID: 30642650.

47  
48  
49  
50 25 Sugimoto T, Sozu T, Hamasaki T. A convenient formula for sample size calculations in

51  
52 clinical trials with multiple co-primary continuous endpoints. *Pharm Stat*. 2012 Mar-

53  
54 Apr;11(2):118-28. doi: 10.1002/pst.505

1  
2  
3 26 Sozu T, Sugimoto T, Hamasaki T, et al. Sample Size Determination in Clinical Trials with  
4 Multiple Endpoints. Springer International Publishing; 2015. <https://doi.org/10.1007/978-3->  
5  
6 319-22005-5  
7  
8

9  
10 27 Russell D, Hoare ZS, Whitaker R, et al. Generalized method for adaptive randomization in  
11 clinical trials. *Stat Med*. 2011 Apr;30(9):922-34. doi: 10.1002/sim.4175 [published Online  
12  
13 First: 1 February 2011].  
14  
15

16  
17 28 Sörensen S, Pinguat M, Duberstein P. How effective are interventions with caregivers? An  
18 updated meta-analysis. *Gerontologist*. 2002 Jun;42(3):356-72. doi: 10.1093/geront/42.3.356  
19  
20  
21

22  
23 29 Kitwood T. Dementia reconsidered: The person comes first. UK: Open University Press;  
24 1997.  
25  
26

27  
28 30 Pot AM, Gallagher-Thompson D, Xiao LD, et al. iSupport: a WHO global online  
29 intervention for informal caregivers of people with dementia. *World Psychiatry*. 2019  
30  
31 Oct;18(3):365-366. doi: 10.1002/wps.20684  
32  
33  
34

35  
36 31 Office for National Statistics (ONS). 2011 Census: Key statistics for Wales, March 2011  
37 [Internet]. UK: ONS; 2012 Dec. Section 10. Proficiency in Welsh; [cited 2022 Jan 28];  
38  
39 <https://www.ons.gov.uk/peoplepopulationandcommunity/populationandmigration/population>  
40  
41  
42  
43  
44  
45  
46  
47  
48  
49  
50  
51  
52  
53  
54  
55  
56  
57  
58  
59  
60

56 32 Alzheimer's Society. Caring for a person with dementia: A practical guide. London:  
57 Alzheimer's Society, 2002 [reviewed 2019]. Available from:  
58  
59 [https://www.alzheimers.org.uk/get-support/publications-factsheets/caring-person-dementia-](https://www.alzheimers.org.uk/get-support/publications-factsheets/caring-person-dementia-practical-guide)  
60  
practical-guide

33 Elsevier Ltd. MACRO (Version 4.9.0.8594) [Computer software]. London; c2018

- 1  
2  
3 34 Vasileiou K, Barnett J, Thorpe S, et al. Characterising and justifying sample size  
4  
5 sufficiency in interview-based studies: systematic analysis of qualitative health research over  
6  
7 a 15-year period. *BMC Med Res Methodol*. 2018 Nov;18(1):148. doi: 10.1186/s12874-018-  
8  
9 0594-7  
10  
11  
12  
13 35 Ritchie J, Lewis J, Elam G. Designing and selecting samples. In: Ritchie J, Lewis J,  
14  
15 editors. *Qualitative research practice: a guide for social science students and researchers*.  
16  
17 London: SAGE Publications Ltd.; 2003. p.77–108.  
18  
19  
20 36 Moore GF, Audrey S, Barker M, et al. Process evaluation of complex interventions:  
21  
22 Medical Research Council guidance. *BMJ*. 2015 Mar;350:h1258. doi: 10.1136/bmj.h1258  
23  
24  
25  
26 37 O'Cathain A, Croot L, Duncan E, et al. Guidance on how to develop complex interventions  
27  
28 to improve health and healthcare. *BMJ Open*. 2019 Aug;9(8):e029954. doi:  
29  
30 10.1136/bmjopen-2019-029954  
31  
32  
33 38 May C, Finch T, Mair F, et al. Understanding the implementation of complex interventions  
34  
35 in health care: the normalization process model. *BMC Health Serv Res*. 2007 Sep;7:148. doi:  
36  
37 10.1186/1472-6963-7-148  
38  
39  
40 39 Brooke J. SUS: A 'quick and dirty' usability scale. In: Jordan PW, Thomas B,  
41  
42 Weerdmeester BA, McClelland IL, editors. *Usability Evaluation in Industry*. London: Taylor  
43  
44 Francis; 1996:189–94.  
45  
46  
47  
48 40 Lancaster GA, Dodd S, Williamson PR. Design and analysis of pilot studies:  
49  
50 recommendations for good practice. *J Eval Clin Pract*. 2004 May;10(2):307-12. doi:  
51  
52 10.1111/j..2002.384.doc.x  
53  
54  
55  
56 41 Braun V, Clarke V. Using thematic analysis in psychology. *Qual Res Psychol*. 2006;3(2):  
57  
58 77-101. doi: 10.1191/1478088706qp063oa  
59  
60

1  
2  
3 42 Pfadenhauer LM, Gerhardus A, Mozygemba K, et al. Making sense of complexity in  
4 context and implementation: the Context and Implementation of Complex Interventions  
5 (CICI) framework. *Implement Sci*. 2017 Feb;12(1):21. doi: 10.1186/s13012-017-0552-5  
6  
7

8  
9  
10 43 Fenwick E, O'Brien BJ, Briggs A. Cost-effectiveness acceptability curves--facts, fallacies  
11 and frequently asked questions. *Health Econ*. 2004 May;13(5):405-15. doi: 10.1002/hec.903  
12  
13  
14

15  
16 44 Wiltsey Stirman S, Baumann AA, Miller CJ. The FRAME: an expanded framework for  
17 reporting adaptations and modifications to evidence-based interventions. *Implement Sci*. 2019  
18 Jun;14(1):58. doi: 10.1186/s13012-019-0898-y  
19  
20  
21  
22

23  
24 45 Dementia Engagement and Empowerment Project (DEEP). The DEEP-Ethics Gold  
25 Standards for Dementia Research [Internet]. Version 1. Exeter (UK): Innovations in  
26 Dementia; 2020 [cited 2022 Jan 28]. [https://www.dementiavoices.org.uk/wp-](https://www.dementiavoices.org.uk/wp-content/uploads/2020/07/The-DEEP-Ethics-Gold-Standards-for-Dementia-Research.pdf)  
27  
28  
29  
30  
31  
32  
33

34 46 Eysenbach G; CONSORT-EHEALTH Group. CONSORT-EHEALTH: improving and  
35 standardizing evaluation reports of Web-based and mobile health interventions. *J Med*  
36  
37  
38  
39  
40  
41  
42  
43  
44  
45  
46  
47  
48  
49  
50  
51  
52  
53  
54  
55  
56  
57  
58  
59  
60

41 47 Husereau D, Drummond M, Augustovski F, et al. Consolidated Health Economic  
42 Evaluation Reporting Standards 2022 (CHEERS 2022) Statement: Updated Reporting  
43 Guidance for Health Economic Evaluations. *Value Health*. 2022 Jan;25(1):3-9. doi:  
44  
45  
46  
47  
48  
49  
50  
51  
52  
53  
54  
55  
56  
57  
58  
59  
60

51 <sup>i</sup> Bédard M, Molloy DW, Squire L, et al. The Zarit Burden Interview: a new short version and  
52 screening version. *Gerontologist*. 2001 Oct;41(5):652-7. doi: 10.1093/geront/41.5.652.  
53  
54  
55  
56  
57  
58  
59  
60

- 1  
2  
3 ii Andresen EM, Byers K, Friary J, et al. Performance of the 10-item Center for  
4  
5  
6 Epidemiologic Studies Depression scale for caregiving research. *SAGE Open Med.* 2013  
7  
8  
9 Dec;1:2050312113514576. doi: 10.1177/2050312113514576.  
10  
11  
12 iii Herdman M, Gudex C, Lloyd A, et al. Development and preliminary testing of the new  
13  
14 five-level version of EQ-5D (EQ-5D-5L). *Qual Life Res.* 2011 Dec;20(10):1727-36. doi:  
15  
16 10.1007/s11136-011-9903-x [published Online First: 09 April 2011].  
17  
18  
19  
20 iv Wagnild G. The Resilience Scale User's Guide for the US English version of the Resilience  
21  
22 Scale and the 14-item Resilience Scale (RS-14). Worden, MT: The Resilience Center; 2009.  
23  
24  
25  
26 v Spitzer RL, Kroenke K, Williams JB, et al. A brief measure for assessing generalized  
27  
28 anxiety disorder: the GAD-7. *Arch Intern Med.* 2006 May;166(10):1092-7. doi:  
29  
30 10.1001/archinte.166.10.1092.  
31  
32  
33  
34 vi Annear MJ, Toye C, Elliott KJ, et al. Dementia knowledge assessment scale (DKAS):  
35  
36 confirmatory factor analysis and comparative subscale scores among an international cohort.  
37  
38  
39  
40 *BMC Geriatr.* 2017 Jul;17(1):168. doi: 10.1186/s12877-017-0552-y.  
41  
42  
43  
44  
45  
46  
47  
48  
49  
50  
51  
52  
53  
54  
55  
56  
57  
58  
59  
60  
57  
58  
59  
60  
vii Hoefman RJ, Van Exel NJA, Brouwer WBF. iMTA Valuation of Informal Care  
Questionnaire (iVICQ). Version 1.0 (December 2011). Rotterdam: iBMG / iMTA, 2011.  
viii Spruytte N, Van Audenhove C, Lammertyn F. The Scale for the Quality of the Current  
Relationship. Internal Report. Leuven: LUCAS-KULeuven; 2000.  
ix Mulhern B, Rowen D, Brazier J, et al. Development of DEMQOL-U and DEMQOL-  
PROXY-U: generation of preference-based indices from DEMQOL and DEMQOL-PROXY

1  
2  
3 for use in economic evaluation. *Health Technol Assess*. 2013 Feb;17(5):v-xv, 1-140. doi:  
4  
5  
6 10.3310/hta17050.  
7

## 8 9 **Figures**

10  
11  
12 Figure 1. iSupport content.  
13

14  
15 Figure 2. Recruitment flowchart.  
16  
17  
18  
19  
20  
21  
22  
23  
24  
25  
26  
27  
28  
29  
30  
31  
32  
33  
34  
35  
36  
37  
38  
39  
40  
41  
42  
43  
44  
45  
46  
47  
48  
49  
50  
51  
52  
53  
54  
55  
56  
57  
58  
59  
60

For peer review only

Figure 1: The content of iSupport for dementia carers

1  
2  
3  
4  
5  
6  
7  
8  
9  
10  
11  
12  
13  
14  
15  
16  
17  
18  
19  
20  
21  
22  
23  
24  
25  
26  
27  
28  
29  
30  
31  
32  
33  
34  
35  
36  
37  
38  
39  
40  
41

# iSupport





Figure 2: Recruitment flow chart

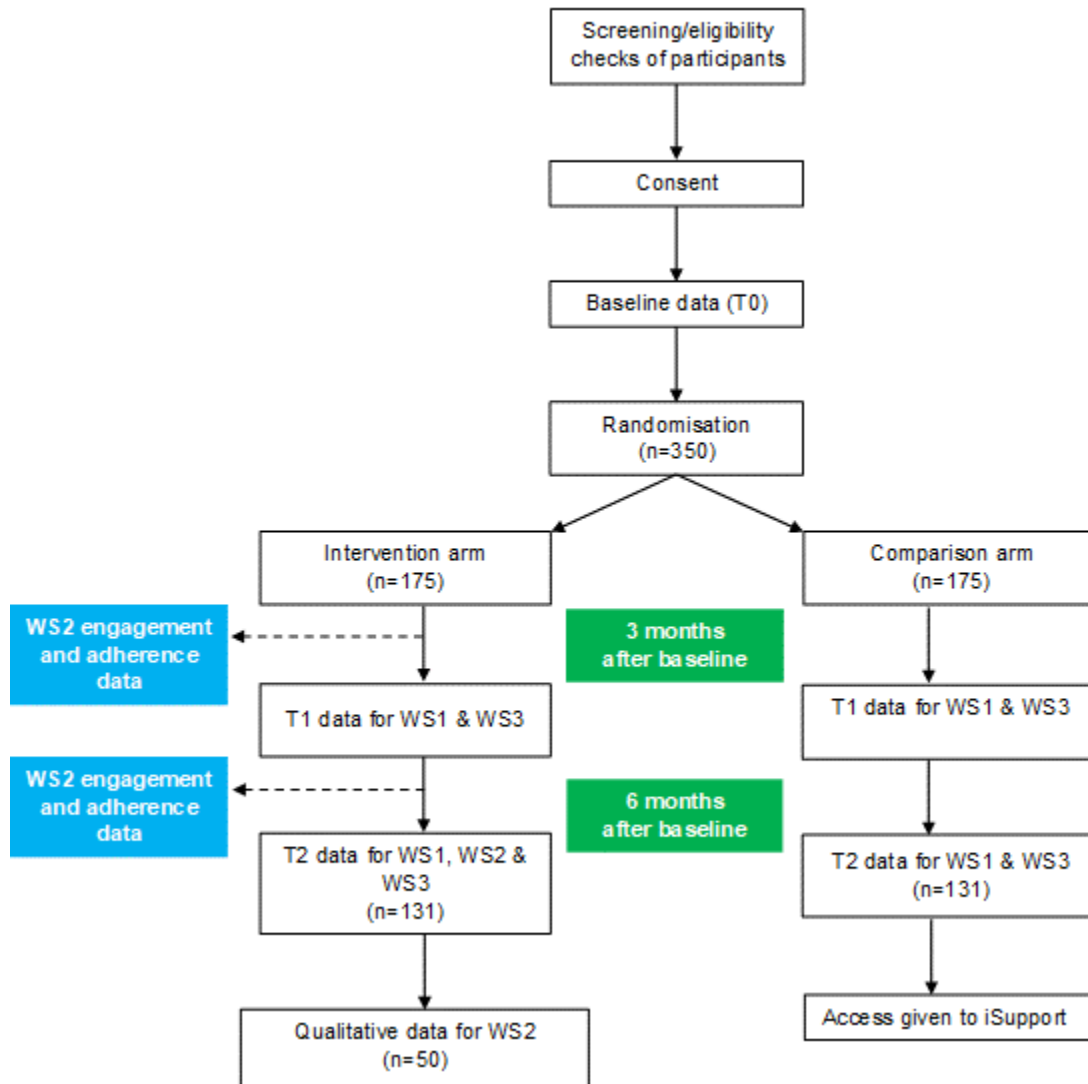

only

## Supplementary Material

### File 1 Objectives for each work-stream

WS1. A definitive pragmatic individually randomised controlled trial across Wales, Scotland and England, with a six-month nested internal pilot. This will:

- Determine progression of the definitive trial based on a go/review/stop criteria (nested internal pilot).
- Determine the effectiveness of ‘iSupport’ in reducing symptoms of distress and/or depression.
- Determine the effectiveness of ‘iSupport’ in reducing symptoms of anxiety.
- Determine the effectiveness of ‘iSupport’ in improving dementia knowledge, relationship quality and resilience.
- Describe the trial sample according to demographic/socioeconomic characteristics.

WS2. A process evaluation will be conducted in line with the established guidelines for process evaluations of complex evaluations<sup>15,16</sup> to determine the barriers and facilitators to the implementation of ‘iSupport’ at scale, and the extent it supports carers in the face of the ongoing or future COVID-19 pandemic. This will:

- Determine participant engagement and adherence to ‘iSupport’.
- Explore the mechanisms of change.
- Identify the external factors to ‘iSupport’ which influence the delivery and function of the intervention.
- Explore the contextual factors that influence the scalability of ‘iSupport’ into wider contexts using the CICI framework.<sup>17</sup>

WS3. A parallel cost-effectiveness analysis, undertaken from both a public sector perspective (NHS, personal social services and local authorities), and a societal perspective (public sector plus opportunity costs). This will:

- Calculate the costs of implementing ‘iSupport’, including technical support and time spent supporting carers to use the tool.
- Explore patterns of, and estimate the cost of, health and social care resource use for carers in the ‘iSupport’ and comparison arms of the trial.
- Explore patterns of, and estimate the cost of, health and social care resource use for the care recipients of carers in the trial.
- Explore the opportunity cost of informal care through the measurement of informal care time, types of care task, impacts on carer’s leisure and employment hours, and carers’ willingness to pay for more support.
- Using QALYs derived from the EQ-5D-5L, determine the cost-effectiveness of ‘iSupport’ compared to the control condition; conduct secondary cost-effectiveness analyses using the Zarit Burden Interview<sup>18</sup> and the Centre for Epidemiological Studies of Depression Scale (CES-D10).<sup>19,20</sup>

**File 2 Recruitment process**

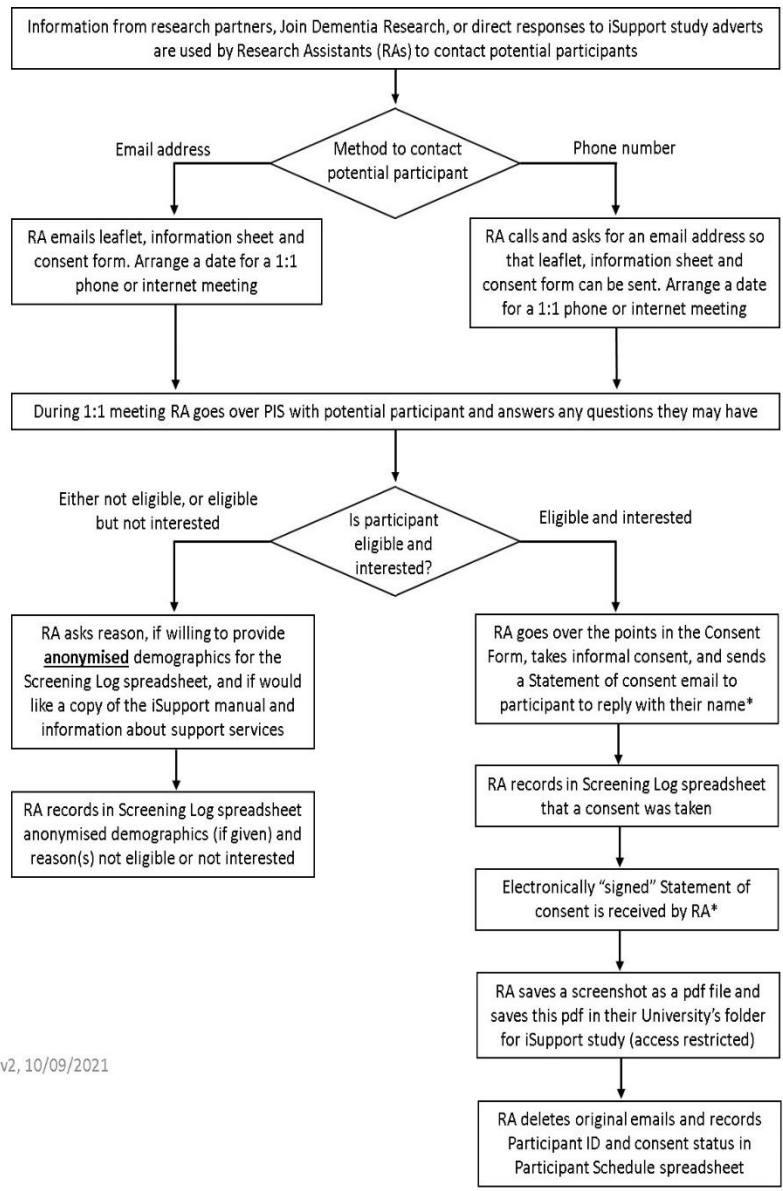

N.B. In the event participants request hard copies or prefer not to use email, paper versions of documents will be posted to their address and the process for taking consent would slightly differ: The participant would sign while on the phone with the researcher, return their signed consent form to the researcher for scanning, and a copy would then be returned to the participant.

iSupport consent flowchart v2, 10/09/2021

**File 3 Feasibility study flowchart**



1  
2  
3  
4  
5  
6  
7

## File 4 Consent Forms

8  
9  
10  
11  
12  
13

### iSupport for Dementia Carers – Main trial

#### Consent Form

14  
15  
16  
17  
18  
19  
20  
21  
22  
23  
24  
25  
26  
27  
28  
29  
30  
31  
32  
33  
34  
35  
36  
37  
38  
39  
40  
41  
42  
43  
44  
45  
46  
47  
48  
49  
50  
51  
52  
53

**Full title of project:** A randomised controlled trial and feasibility study of the effects of an e-health intervention ‘iSupport’ for reducing distress of dementia carers, especially in the ongoing pandemic of COVID-19

**Project number:** NIHR\_130914

**Name of lead investigator:** Prof. Gill Windle

[The process for technology-mediated consent is detailed in the protocol]

**Participant identification number:** \_\_\_\_\_

**Please initial each box**

|    |                                                                                                                                                                                                                           |  |
|----|---------------------------------------------------------------------------------------------------------------------------------------------------------------------------------------------------------------------------|--|
| 1. | I confirm that I have read and understood the information sheet dated 25/10/2021 (version 2) for this study, had the opportunity to ask questions and have had these answered satisfactorily.                             |  |
| 2. | I understand that my participation is voluntary and that I am free to withdraw at any time, without giving any reason. I understand that if I withdraw this will not affect my health care or my legal rights in any way. |  |
| 3. | I understand that if I withdraw from the study the research team may continue to use the information that I previously provided up to that point, unless I indicate I do not want them to.                                |  |
| 4. | I understand that the information collected about me may be used to support other research in the future, and may be shared anonymously with other researchers.                                                           |  |
| 5. | I understand that I will not be identifiable in any data published in relation to this project.                                                                                                                           |  |
| 6. | I understand this study requires my involvement for six months and that I will be contacted by the research team approximately 3 months and 6 months after today's date.                                                  |  |
| 7. | I understand that if the researchers hear or observe anything that causes serious concern about my health, safety or well-being, or that of another person close to me, they have a duty to inform the lead investigator. |  |
| 8. | I agree that my anonymised data can be deposited and securely stored in a data archive.                                                                                                                                   |  |
| 9. | I agree to take part in the above study.                                                                                                                                                                                  |  |

Name of Participant

Date

Signature

\_\_\_\_\_

\_\_\_\_\_

\_\_\_\_\_

Name of person  
taking consent

Date

Signature

\_\_\_\_\_

\_\_\_\_\_

\_\_\_\_\_



## Adaptation of iSupport for younger dementia carers (Phase 1) Consent Form

**Full title of project:** A randomised controlled trial and feasibility study of the effects of an e-health intervention ‘iSupport’ for reducing distress of dementia carers, especially in the ongoing pandemic of COVID-19

**Project number:** NIHR\_130914

**Name of lead investigator:** Prof. Gill Windle

[The process for technology-mediated consent is detailed in the protocol]

**Participant identification number:** \_\_\_\_\_

**Please initial each box**

|     |                                                                                                                                                                                                                                 |  |
|-----|---------------------------------------------------------------------------------------------------------------------------------------------------------------------------------------------------------------------------------|--|
| 1.  | I confirm that I have read and understood the information sheet dated 25/10/2021 (version 3) for this study, had the opportunity to ask questions and have had these answered satisfactorily.                                   |  |
| 2.  | I understand that my participation is voluntary and that I am free to withdraw at any time, without giving any reason. I understand that if I withdraw this will not affect my health care or my legal rights in any way.       |  |
| 3.  | I agree to the workshops being audio and video recorded by the researcher as part of the study.                                                                                                                                 |  |
| 4.  | I understand that if I withdraw from the study the research team may continue to use the information that I previously provided up to that point, unless I indicate I do not want them to.                                      |  |
| 5.  | I understand that the information collected about me may be used to support other research in the future, and may be shared anonymously with other researchers.                                                                 |  |
| 6.  | I understand that I will not be identifiable in any data published in relation to this project.                                                                                                                                 |  |
| 7.  | I agree that my anonymised data can be deposited and securely stored in a data archive.                                                                                                                                         |  |
| 8.  | I understand that if the researchers hear or observe anything that causes serious concern about my health, safety or well-being, or that of another person close to me, they have a duty to inform the lead investigator.       |  |
| 9.  | I understand that as part of the study there is a procedure in place which deals with disclosures of malpractice or abuse reported by participants and in such instances researchers will be required to break confidentiality. |  |
| 10. | I agree to take part in the above study.                                                                                                                                                                                        |  |

Name of Participant

Date

Signature

\_\_\_\_\_  
Name of person  
taking consent

\_\_\_\_\_  
Date

\_\_\_\_\_  
Signature

**Feasibility testing iSupport for younger dementia carers (Phase 2) Consent Form**

**Full title of project:** A randomised controlled trial and feasibility study of the effects of an e-health intervention ‘iSupport’ for reducing distress of dementia carers, especially in the ongoing pandemic of COVID-19

**Project number:** NIHR\_130914

**Name of lead investigator:** Prof. Gill Windle

[The process for technology-mediated consent is detailed in the protocol]

**Participant identification number:** \_\_\_\_\_

**Please initial each box**

|     |                                                                                                                                                                                                                                 |  |
|-----|---------------------------------------------------------------------------------------------------------------------------------------------------------------------------------------------------------------------------------|--|
| 1.  | I confirm that I have read and understood the information sheet dated 25/10/2021 (version 2) for this study, had the opportunity to ask questions and have had these answered satisfactorily.                                   |  |
| 2.  | I understand that my participation is voluntary and that I am free to withdraw at any time, without giving any reason. I understand that if I withdraw this will not affect my health care or my legal rights in any way.       |  |
| 3.  | I understand this study requires my involvement for six months and that I will be contacted by the research team approximately 3 months and 6 months after today’s date.                                                        |  |
| 4.  | I understand that if I withdraw from the study the research team may continue to use the information that I previously provided up to that point, unless I indicate I do not want them to.                                      |  |
| 5.  | I understand that the information collected about me may be used to support other research in the future, and may be shared anonymously with other researchers.                                                                 |  |
| 6.  | I understand that I will not be identifiable in any data published in relation to this project.                                                                                                                                 |  |
| 7.  | I agree that my anonymised data can be deposited and securely stored in a data archive.                                                                                                                                         |  |
| 8.  | I understand that if the researchers hear or observe anything that causes serious concern about my health, safety or well-being, or that of another person close to me, they have a duty to inform the lead investigator.       |  |
| 9.  | I understand that as part of the study there is a procedure in place which deals with disclosures of malpractice or abuse reported by participants and in such instances researchers will be required to break confidentiality. |  |
| 10. | I agree to take part in the above study.                                                                                                                                                                                        |  |

Name of Participant

Date

Signature

\_\_\_\_\_  
Name of person  
taking consent

\_\_\_\_\_  
Date

\_\_\_\_\_  
Signature



1  
2  
3  
4  
5  
6  
7  
8  
9  
10  
11  
12  
13  
14  
15  
16  
17  
18  
19  
20  
21  
22  
23  
24  
25  
26  
27  
28  
29  
30  
31  
32  
33  
34  
35  
36  
37  
38  
39  
40  
41  
42  
43  
44  
45  
46  
47  
48  
49  
50  
51  
52  
53  
54  
55  
56  
57  
58  
59  
60

For peer review only

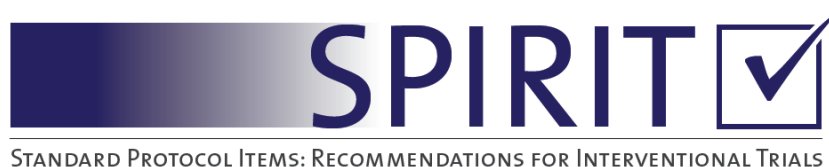

SPIRIT 2013 Checklist: Recommended items to address in a clinical trial protocol and related documents\*

| Section/item                      | Item No | Description                                                                                                                                                                                                                                                                              |
|-----------------------------------|---------|------------------------------------------------------------------------------------------------------------------------------------------------------------------------------------------------------------------------------------------------------------------------------------------|
| <b>Administrative information</b> |         |                                                                                                                                                                                                                                                                                          |
| ✓ Title                           | 1       | Descriptive title identifying the study design, population, interventions, and, if applicable, trial acronym                                                                                                                                                                             |
| ✓ Trial registration              | 2a      | Trial identifier and registry name. If not yet registered, name of intended registry                                                                                                                                                                                                     |
| ✓                                 | 2b      | All items from the World Health Organization Trial Registration Data Set                                                                                                                                                                                                                 |
| ✓ Protocol version                | 3       | Date and version identifier                                                                                                                                                                                                                                                              |
| ✓ Funding                         | 4       | Sources and types of financial, material, and other support                                                                                                                                                                                                                              |
| ✓ Roles and responsibilities      | 5a      | Names, affiliations, and roles of protocol contributors                                                                                                                                                                                                                                  |
| ✓                                 | 5b      | Name and contact information for the trial sponsor                                                                                                                                                                                                                                       |
| ✓                                 | 5c      | Role of study sponsor and funders, if any, in study design; collection, management, analysis, and interpretation of data; writing of the report; and the decision to submit the report for publication, including whether they will have ultimate authority over any of these activities |
| ✓                                 | 5d      | Composition, roles, and responsibilities of the coordinating centre, steering committee, endpoint adjudication committee, data management team, and other individuals or groups overseeing the trial, if applicable (see Item 21a for data monitoring committee)                         |
| <b>Introduction</b>               |         |                                                                                                                                                                                                                                                                                          |
| ✓ Background and rationale        | 6a      | Description of research question and justification for undertaking the trial, including summary of relevant studies (published and unpublished) examining benefits and harms for each intervention                                                                                       |
| ✓                                 | 6b      | Explanation for choice of comparators                                                                                                                                                                                                                                                    |
| ✓ Objectives                      | 7       | Specific objectives or hypotheses                                                                                                                                                                                                                                                        |
| ✓ Trial design                    | 8       | Description of trial design including type of trial (eg, parallel group, crossover, factorial, single group), allocation ratio, and framework (eg, superiority, equivalence, noninferiority, exploratory)                                                                                |

## Methods: Participants, interventions, and outcomes

|    |   |                      |                                                                                                                                                                                                                                                                                                                                                                                   |
|----|---|----------------------|-----------------------------------------------------------------------------------------------------------------------------------------------------------------------------------------------------------------------------------------------------------------------------------------------------------------------------------------------------------------------------------|
| 1  |   |                      |                                                                                                                                                                                                                                                                                                                                                                                   |
| 2  |   |                      |                                                                                                                                                                                                                                                                                                                                                                                   |
| 3  |   |                      |                                                                                                                                                                                                                                                                                                                                                                                   |
| 4  | ✓ | Study setting        | 9 Description of study settings (eg, community clinic, academic hospital) and list of countries where data will be collected. Reference to where list of study sites can be obtained                                                                                                                                                                                              |
| 5  |   |                      |                                                                                                                                                                                                                                                                                                                                                                                   |
| 6  |   |                      |                                                                                                                                                                                                                                                                                                                                                                                   |
| 7  |   |                      |                                                                                                                                                                                                                                                                                                                                                                                   |
| 8  | ✓ | Eligibility criteria | 10 Inclusion and exclusion criteria for participants. If applicable, eligibility criteria for study centres and individuals who will perform the interventions (eg, surgeons, psychotherapists)                                                                                                                                                                                   |
| 9  |   |                      |                                                                                                                                                                                                                                                                                                                                                                                   |
| 10 |   |                      |                                                                                                                                                                                                                                                                                                                                                                                   |
| 11 |   |                      |                                                                                                                                                                                                                                                                                                                                                                                   |
| 12 |   |                      |                                                                                                                                                                                                                                                                                                                                                                                   |
| 13 | ✓ | Interventions        | 11a Interventions for each group with sufficient detail to allow replication, including how and when they will be administered                                                                                                                                                                                                                                                    |
| 14 |   |                      |                                                                                                                                                                                                                                                                                                                                                                                   |
| 15 |   |                      |                                                                                                                                                                                                                                                                                                                                                                                   |
| 16 |   |                      |                                                                                                                                                                                                                                                                                                                                                                                   |
| 17 | ✓ |                      | 11b Criteria for discontinuing or modifying allocated interventions for a given trial participant (eg, drug dose change in response to harms, participant request, or improving/worsening disease)                                                                                                                                                                                |
| 18 |   |                      |                                                                                                                                                                                                                                                                                                                                                                                   |
| 19 |   |                      |                                                                                                                                                                                                                                                                                                                                                                                   |
| 20 |   |                      |                                                                                                                                                                                                                                                                                                                                                                                   |
| 21 | ✓ |                      | 11c Strategies to improve adherence to intervention protocols, and any procedures for monitoring adherence (eg, drug tablet return, laboratory tests)                                                                                                                                                                                                                             |
| 22 |   |                      |                                                                                                                                                                                                                                                                                                                                                                                   |
| 23 |   |                      |                                                                                                                                                                                                                                                                                                                                                                                   |
| 24 |   |                      |                                                                                                                                                                                                                                                                                                                                                                                   |
| 25 | ✓ |                      | 11d Relevant concomitant care and interventions that are permitted or prohibited during the trial                                                                                                                                                                                                                                                                                 |
| 26 |   |                      |                                                                                                                                                                                                                                                                                                                                                                                   |
| 27 |   |                      |                                                                                                                                                                                                                                                                                                                                                                                   |
| 28 |   | Outcomes             | 12 Primary, secondary, and other outcomes, including the specific measurement variable (eg, systolic blood pressure), analysis metric (eg, change from baseline, final value, time to event), method of aggregation (eg, median, proportion), and time point for each outcome. Explanation of the clinical relevance of chosen efficacy and harm outcomes is strongly recommended |
| 29 | ✓ |                      |                                                                                                                                                                                                                                                                                                                                                                                   |
| 30 |   |                      |                                                                                                                                                                                                                                                                                                                                                                                   |
| 31 |   |                      |                                                                                                                                                                                                                                                                                                                                                                                   |
| 32 |   |                      |                                                                                                                                                                                                                                                                                                                                                                                   |
| 33 |   |                      |                                                                                                                                                                                                                                                                                                                                                                                   |
| 34 |   |                      |                                                                                                                                                                                                                                                                                                                                                                                   |
| 35 |   |                      |                                                                                                                                                                                                                                                                                                                                                                                   |
| 36 | ✓ | Participant timeline | 13 Time schedule of enrolment, interventions (including any run-ins and washouts), assessments, and visits for participants. A schematic diagram is highly recommended (see Figure)                                                                                                                                                                                               |
| 37 |   |                      |                                                                                                                                                                                                                                                                                                                                                                                   |
| 38 |   |                      |                                                                                                                                                                                                                                                                                                                                                                                   |
| 39 |   |                      |                                                                                                                                                                                                                                                                                                                                                                                   |
| 40 |   |                      |                                                                                                                                                                                                                                                                                                                                                                                   |
| 41 | ✓ | Sample size          | 14 Estimated number of participants needed to achieve study objectives and how it was determined, including clinical and statistical assumptions supporting any sample size calculations                                                                                                                                                                                          |
| 42 |   |                      |                                                                                                                                                                                                                                                                                                                                                                                   |
| 43 |   |                      |                                                                                                                                                                                                                                                                                                                                                                                   |
| 44 |   |                      |                                                                                                                                                                                                                                                                                                                                                                                   |
| 45 | ✓ | Recruitment          | 15 Strategies for achieving adequate participant enrolment to reach target sample size                                                                                                                                                                                                                                                                                            |
| 46 |   |                      |                                                                                                                                                                                                                                                                                                                                                                                   |
| 47 |   |                      |                                                                                                                                                                                                                                                                                                                                                                                   |

## Methods: Assignment of interventions (for controlled trials)

### Allocation:

|    |   |                     |                                                                                                                                                                                                                                                                                                                                                              |
|----|---|---------------------|--------------------------------------------------------------------------------------------------------------------------------------------------------------------------------------------------------------------------------------------------------------------------------------------------------------------------------------------------------------|
| 51 |   |                     |                                                                                                                                                                                                                                                                                                                                                              |
| 52 |   |                     |                                                                                                                                                                                                                                                                                                                                                              |
| 53 | ✓ | Sequence generation | 16a Method of generating the allocation sequence (eg, computer-generated random numbers), and list of any factors for stratification. To reduce predictability of a random sequence, details of any planned restriction (eg, blocking) should be provided in a separate document that is unavailable to those who enrol participants or assign interventions |
| 54 |   |                     |                                                                                                                                                                                                                                                                                                                                                              |
| 55 |   |                     |                                                                                                                                                                                                                                                                                                                                                              |
| 56 |   |                     |                                                                                                                                                                                                                                                                                                                                                              |
| 57 |   |                     |                                                                                                                                                                                                                                                                                                                                                              |
| 58 |   |                     |                                                                                                                                                                                                                                                                                                                                                              |
| 59 |   |                     |                                                                                                                                                                                                                                                                                                                                                              |
| 60 |   |                     |                                                                                                                                                                                                                                                                                                                                                              |

|    |   |                                  |     |                                                                                                                                                                                                           |
|----|---|----------------------------------|-----|-----------------------------------------------------------------------------------------------------------------------------------------------------------------------------------------------------------|
| 1  |   |                                  |     |                                                                                                                                                                                                           |
| 2  | ✓ | Allocation concealment mechanism | 16b | Mechanism of implementing the allocation sequence (eg, central telephone; sequentially numbered, opaque, sealed envelopes), describing any steps to conceal the sequence until interventions are assigned |
| 3  |   |                                  |     |                                                                                                                                                                                                           |
| 4  |   |                                  |     |                                                                                                                                                                                                           |
| 5  |   |                                  |     |                                                                                                                                                                                                           |
| 6  |   |                                  |     |                                                                                                                                                                                                           |
| 7  | ✓ | Implementation                   | 16c | Who will generate the allocation sequence, who will enrol participants, and who will assign participants to interventions                                                                                 |
| 8  |   |                                  |     |                                                                                                                                                                                                           |
| 9  |   |                                  |     |                                                                                                                                                                                                           |
| 10 |   |                                  |     |                                                                                                                                                                                                           |
| 11 | ✓ | Blinding (masking)               | 17a | Who will be blinded after assignment to interventions (eg, trial participants, care providers, outcome assessors, data analysts), and how                                                                 |
| 12 |   |                                  |     |                                                                                                                                                                                                           |
| 13 |   |                                  |     |                                                                                                                                                                                                           |
| 14 |   |                                  |     |                                                                                                                                                                                                           |
| 15 | ✓ |                                  | 17b | If blinded, circumstances under which unblinding is permissible, and procedure for revealing a participant's allocated intervention during the trial                                                      |
| 16 |   |                                  |     |                                                                                                                                                                                                           |
| 17 |   |                                  |     |                                                                                                                                                                                                           |
| 18 |   |                                  |     |                                                                                                                                                                                                           |

### Methods: Data collection, management, and analysis

|    |   |                         |     |                                                                                                                                                                                                                                                                                                                                                                                                              |
|----|---|-------------------------|-----|--------------------------------------------------------------------------------------------------------------------------------------------------------------------------------------------------------------------------------------------------------------------------------------------------------------------------------------------------------------------------------------------------------------|
| 19 |   |                         |     |                                                                                                                                                                                                                                                                                                                                                                                                              |
| 20 |   |                         |     |                                                                                                                                                                                                                                                                                                                                                                                                              |
| 21 |   |                         |     |                                                                                                                                                                                                                                                                                                                                                                                                              |
| 22 | ✓ | Data collection methods | 18a | Plans for assessment and collection of outcome, baseline, and other trial data, including any related processes to promote data quality (eg, duplicate measurements, training of assessors) and a description of study instruments (eg, questionnaires, laboratory tests) along with their reliability and validity, if known. Reference to where data collection forms can be found, if not in the protocol |
| 23 |   |                         |     |                                                                                                                                                                                                                                                                                                                                                                                                              |
| 24 |   |                         |     |                                                                                                                                                                                                                                                                                                                                                                                                              |
| 25 |   |                         |     |                                                                                                                                                                                                                                                                                                                                                                                                              |
| 26 |   |                         |     |                                                                                                                                                                                                                                                                                                                                                                                                              |
| 27 |   |                         |     |                                                                                                                                                                                                                                                                                                                                                                                                              |
| 28 |   |                         |     |                                                                                                                                                                                                                                                                                                                                                                                                              |
| 29 |   |                         |     |                                                                                                                                                                                                                                                                                                                                                                                                              |
| 30 | ✓ |                         | 18b | Plans to promote participant retention and complete follow-up, including list of any outcome data to be collected for participants who discontinue or deviate from intervention protocols                                                                                                                                                                                                                    |
| 31 |   |                         |     |                                                                                                                                                                                                                                                                                                                                                                                                              |
| 32 |   |                         |     |                                                                                                                                                                                                                                                                                                                                                                                                              |
| 33 |   |                         |     |                                                                                                                                                                                                                                                                                                                                                                                                              |
| 34 | ✓ | Data management         | 19  | Plans for data entry, coding, security, and storage, including any related processes to promote data quality (eg, double data entry; range checks for data values). Reference to where details of data management procedures can be found, if not in the protocol                                                                                                                                            |
| 35 |   |                         |     |                                                                                                                                                                                                                                                                                                                                                                                                              |
| 36 |   |                         |     |                                                                                                                                                                                                                                                                                                                                                                                                              |
| 37 |   |                         |     |                                                                                                                                                                                                                                                                                                                                                                                                              |
| 38 |   |                         |     |                                                                                                                                                                                                                                                                                                                                                                                                              |
| 39 |   |                         |     |                                                                                                                                                                                                                                                                                                                                                                                                              |
| 40 | ✓ | Statistical methods     | 20a | Statistical methods for analysing primary and secondary outcomes. Reference to where other details of the statistical analysis plan can be found, if not in the protocol                                                                                                                                                                                                                                     |
| 41 |   |                         |     |                                                                                                                                                                                                                                                                                                                                                                                                              |
| 42 |   |                         |     |                                                                                                                                                                                                                                                                                                                                                                                                              |
| 43 |   |                         |     |                                                                                                                                                                                                                                                                                                                                                                                                              |
| 44 |   |                         |     |                                                                                                                                                                                                                                                                                                                                                                                                              |
| 45 | ✓ |                         | 20b | Methods for any additional analyses (eg, subgroup and adjusted analyses)                                                                                                                                                                                                                                                                                                                                     |
| 46 |   |                         |     |                                                                                                                                                                                                                                                                                                                                                                                                              |
| 47 |   |                         |     |                                                                                                                                                                                                                                                                                                                                                                                                              |
| 48 | ✓ |                         | 20c | Definition of analysis population relating to protocol non-adherence (eg, as randomised analysis), and any statistical methods to handle missing data (eg, multiple imputation)                                                                                                                                                                                                                              |
| 49 |   |                         |     |                                                                                                                                                                                                                                                                                                                                                                                                              |
| 50 |   |                         |     |                                                                                                                                                                                                                                                                                                                                                                                                              |

### Methods: Monitoring

|    |   |                 |     |                                                                                                                                                                                                                                                                                                                                       |
|----|---|-----------------|-----|---------------------------------------------------------------------------------------------------------------------------------------------------------------------------------------------------------------------------------------------------------------------------------------------------------------------------------------|
| 51 |   |                 |     |                                                                                                                                                                                                                                                                                                                                       |
| 52 |   |                 |     |                                                                                                                                                                                                                                                                                                                                       |
| 53 |   |                 |     |                                                                                                                                                                                                                                                                                                                                       |
| 54 | ✓ | Data monitoring | 21a | Composition of data monitoring committee (DMC); summary of its role and reporting structure; statement of whether it is independent from the sponsor and competing interests; and reference to where further details about its charter can be found, if not in the protocol. Alternatively, an explanation of why a DMC is not needed |
| 55 |   |                 |     |                                                                                                                                                                                                                                                                                                                                       |
| 56 |   |                 |     |                                                                                                                                                                                                                                                                                                                                       |
| 57 |   |                 |     |                                                                                                                                                                                                                                                                                                                                       |
| 58 |   |                 |     |                                                                                                                                                                                                                                                                                                                                       |
| 59 |   |                 |     |                                                                                                                                                                                                                                                                                                                                       |
| 60 |   |                 |     |                                                                                                                                                                                                                                                                                                                                       |

|    |     |                                 |     |                                                                                                                                                                                                                                                                                     |
|----|-----|---------------------------------|-----|-------------------------------------------------------------------------------------------------------------------------------------------------------------------------------------------------------------------------------------------------------------------------------------|
| 1  |     |                                 |     |                                                                                                                                                                                                                                                                                     |
| 2  | ✓   |                                 | 21b | Description of any interim analyses and stopping guidelines, including who will have access to these interim results and make the final decision to terminate the trial                                                                                                             |
| 3  |     |                                 |     |                                                                                                                                                                                                                                                                                     |
| 4  |     |                                 |     |                                                                                                                                                                                                                                                                                     |
| 5  |     |                                 |     |                                                                                                                                                                                                                                                                                     |
| 6  | ✓   | Harms                           | 22  | Plans for collecting, assessing, reporting, and managing solicited and spontaneously reported adverse events and other unintended effects of trial interventions or trial conduct                                                                                                   |
| 7  |     |                                 |     |                                                                                                                                                                                                                                                                                     |
| 8  |     |                                 |     |                                                                                                                                                                                                                                                                                     |
| 9  |     |                                 |     |                                                                                                                                                                                                                                                                                     |
| 10 | ✓   | Auditing                        | 23  | Frequency and procedures for auditing trial conduct, if any, and whether the process will be independent from investigators and the sponsor                                                                                                                                         |
| 11 |     |                                 |     |                                                                                                                                                                                                                                                                                     |
| 12 |     |                                 |     |                                                                                                                                                                                                                                                                                     |
| 13 |     |                                 |     |                                                                                                                                                                                                                                                                                     |
| 14 |     |                                 |     |                                                                                                                                                                                                                                                                                     |
| 15 |     |                                 |     |                                                                                                                                                                                                                                                                                     |
| 16 |     | <b>Ethics and dissemination</b> |     |                                                                                                                                                                                                                                                                                     |
| 17 | ✓   | Research ethics approval        | 24  | Plans for seeking research ethics committee/institutional review board (REC/IRB) approval                                                                                                                                                                                           |
| 18 |     |                                 |     |                                                                                                                                                                                                                                                                                     |
| 19 |     |                                 |     |                                                                                                                                                                                                                                                                                     |
| 20 | ✓   | Protocol amendments             | 25  | Plans for communicating important protocol modifications (eg, changes to eligibility criteria, outcomes, analyses) to relevant parties (eg, investigators, REC/IRBs, trial participants, trial registries, journals, regulators)                                                    |
| 21 |     |                                 |     |                                                                                                                                                                                                                                                                                     |
| 22 |     |                                 |     |                                                                                                                                                                                                                                                                                     |
| 23 |     |                                 |     |                                                                                                                                                                                                                                                                                     |
| 24 |     |                                 |     |                                                                                                                                                                                                                                                                                     |
| 25 |     |                                 |     |                                                                                                                                                                                                                                                                                     |
| 26 | ✓   | Consent or assent               | 26a | Who will obtain informed consent or assent from potential trial participants or authorised surrogates, and how (see Item 32)                                                                                                                                                        |
| 27 |     |                                 |     |                                                                                                                                                                                                                                                                                     |
| 28 |     |                                 |     |                                                                                                                                                                                                                                                                                     |
| 29 |     |                                 |     |                                                                                                                                                                                                                                                                                     |
| 30 | N/A |                                 | 26b | Additional consent provisions for collection and use of participant data and biological specimens in ancillary studies, if applicable                                                                                                                                               |
| 31 |     |                                 |     |                                                                                                                                                                                                                                                                                     |
| 32 |     |                                 |     |                                                                                                                                                                                                                                                                                     |
| 33 | ✓   | Confidentiality                 | 27  | How personal information about potential and enrolled participants will be collected, shared, and maintained in order to protect confidentiality before, during, and after the trial                                                                                                |
| 34 |     |                                 |     |                                                                                                                                                                                                                                                                                     |
| 35 |     |                                 |     |                                                                                                                                                                                                                                                                                     |
| 36 |     |                                 |     |                                                                                                                                                                                                                                                                                     |
| 37 | ✓   | Declaration of interests        | 28  | Financial and other competing interests for principal investigators for the overall trial and each study site                                                                                                                                                                       |
| 38 |     |                                 |     |                                                                                                                                                                                                                                                                                     |
| 39 |     |                                 |     |                                                                                                                                                                                                                                                                                     |
| 40 | ✓   | Access to data                  | 29  | Statement of who will have access to the final trial dataset, and disclosure of contractual agreements that limit such access for investigators                                                                                                                                     |
| 41 |     |                                 |     |                                                                                                                                                                                                                                                                                     |
| 42 |     |                                 |     |                                                                                                                                                                                                                                                                                     |
| 43 |     |                                 |     |                                                                                                                                                                                                                                                                                     |
| 44 |     |                                 |     |                                                                                                                                                                                                                                                                                     |
| 45 | N/A | Ancillary and post-trial care   | 30  | Provisions, if any, for ancillary and post-trial care, and for compensation to those who suffer harm from trial participation                                                                                                                                                       |
| 46 |     |                                 |     |                                                                                                                                                                                                                                                                                     |
| 47 |     |                                 |     |                                                                                                                                                                                                                                                                                     |
| 48 | ✓   | Dissemination policy            | 31a | Plans for investigators and sponsor to communicate trial results to participants, healthcare professionals, the public, and other relevant groups (eg, via publication, reporting in results databases, or other data sharing arrangements), including any publication restrictions |
| 49 |     |                                 |     |                                                                                                                                                                                                                                                                                     |
| 50 |     |                                 |     |                                                                                                                                                                                                                                                                                     |
| 51 |     |                                 |     |                                                                                                                                                                                                                                                                                     |
| 52 |     |                                 |     |                                                                                                                                                                                                                                                                                     |
| 53 |     |                                 |     |                                                                                                                                                                                                                                                                                     |
| 54 | ✓   |                                 | 31b | Authorship eligibility guidelines and any intended use of professional writers                                                                                                                                                                                                      |
| 55 |     |                                 |     |                                                                                                                                                                                                                                                                                     |
| 56 |     |                                 |     |                                                                                                                                                                                                                                                                                     |
| 57 | ✓   |                                 | 31c | Plans, if any, for granting public access to the full protocol, participant-level dataset, and statistical code                                                                                                                                                                     |
| 58 |     |                                 |     |                                                                                                                                                                                                                                                                                     |
| 59 |     |                                 |     |                                                                                                                                                                                                                                                                                     |
| 60 |     |                                 |     |                                                                                                                                                                                                                                                                                     |

## Appendices

|   |     |                  |                                                                           |
|---|-----|------------------|---------------------------------------------------------------------------|
| 1 |     |                  |                                                                           |
| 2 |     |                  |                                                                           |
| 3 |     |                  |                                                                           |
| 4 | N/A | Informed consent | 32 Model consent form and other related documentation given to            |
| 5 |     | materials        | participants and authorised surrogates                                    |
| 6 |     |                  |                                                                           |
| 7 |     | Biological       | 33 Plans for collection, laboratory evaluation, and storage of biological |
| 8 | N/A | specimens        | specimens for genetic or molecular analysis in the current trial and for  |
| 9 |     |                  | future use in ancillary studies, if applicable                            |

---

\*It is strongly recommended that this checklist be read in conjunction with the SPIRIT 2013 Explanation & Elaboration for important clarification on the items. Amendments to the protocol should be tracked and dated. The SPIRIT checklist is copyrighted by the SPIRIT Group under the Creative Commons "[Attribution-NonCommercial-NoDerivs 3.0 Unported](https://creativecommons.org/licenses/by-nc-nd/3.0/)" license.

For peer review only
