# Supplementary material for: Effects of an e-health intervention ‘iSupport’ for reducing distress of dementia carers: protocol for a randomised controlled trial and feasibility study
Source: PubMed Central journal article supplement (PMC9494593; doi:10.1136/bmjopen-2022-064314), 2022-09-21
Supplement: bmjopen-2022-064314.reviewer_comments.pdf [file bmjopen-2022-064314.reviewer_comments.pdf]

## PEER REVIEW HISTORY

BMJ Open publishes all reviews undertaken for accepted manuscripts. Reviewers are asked to complete a checklist review form (<http://bmjopen.bmj.com/site/about/resources/checklist.pdf>) and are provided with free text boxes to elaborate on their assessment. These free text comments are reproduced below.

## ARTICLE DETAILS

|                            |                                                                                                                                                                                                                                             |
|----------------------------|---------------------------------------------------------------------------------------------------------------------------------------------------------------------------------------------------------------------------------------------|
| <b>TITLE (PROVISIONAL)</b> | The effects of an e-health intervention ('iSupport') for reducing distress of dementia carers: protocol for a randomised controlled trial and feasibility study                                                                             |
| <b>AUTHORS</b>             | Windle, Gill; Flynn, Greg; Hoare, Zoe; Masterson-Algar, Patricia; Egan, Kieren; Edwards, Rhiannon; Jones, Carys; Spector, Aimee; Algar-Skaife, Katherine; Hughes, Gwenllian; Brocklehurst, P; Goulden, Nia; Skelhorn, Debbie; Stott, Joshua |

This article was not externally reviewed at BMJ Open. Protocols that have been independently assessed prior to submission to BMJ Open are usually fast-tracked to publication on the grounds that further substantial changes will not be possible. This independent assessment will usually be external, independent review for both a substantial grant award from a non-commercial or government funder and ethics approval.
